# Supplementary material for: miRNAs Related to Immune Checkpoint Inhibitor Response: A Systematic Review
Source: MDPI journal article supplement (doi:10.3390/ijms25031737), 2024-02-01
Supplement: s1 [file s1]

Supplementary Table S1. List of reviewed works

| Title                                                                                                                                                                                                                   | DOI                                 | Document Type       | Year of publication | Analysis                                                                                                                      |
|-------------------------------------------------------------------------------------------------------------------------------------------------------------------------------------------------------------------------|-------------------------------------|---------------------|---------------------|-------------------------------------------------------------------------------------------------------------------------------|
| [Genomic Analysis and Immunotherapy by Liquid Biopsy].                                                                                                                                                                  |                                     | Article             | 2019                | Not written in English                                                                                                        |
| [Molecular pathogenesis and its therapeutic implication for ATL]                                                                                                                                                        | 10.11406/rinketsu.58.2004           | Review              | 2017                | Not written in English                                                                                                        |
| [Novel miRNAs as Potential Regulators of PD-1/PD-L1 Immune Checkpoint, and Prognostic Value of MIR9-1 and MIR124-2 Methylation in Ovarian Cancer].                                                                      | 10.31857/S00268898420060075         | Article             | 2020                | Not written in English                                                                                                        |
| [Polysaccharide of Atractylodis Macrocephalae Rhizoma inhibits expression of immune checkpoint PD-L1 by targeting miR-34a in esophageal carcinoma cells]                                                                | 10.19540/cnki.jcqm.20211203.701     | Article             | 2022                | Not written in English                                                                                                        |
| [Regulation of PD-L1 by MicroRNA in Mismatch Repair Deficient-Colorectal Cancer].                                                                                                                                       |                                     | Article             | 2017                | Not written in English                                                                                                        |
| 2Bp Hijacking COAT1-miR-17-5p axis alleviates immune checkpoint blockers resistance in PDL1+ TNBC patients                                                                                                              | 10.1016/j.annonc.2021.01.042        | Conference Abstract | 2021                | Not an original study                                                                                                         |
| 3,3'-Diindolylmethane Ameliorates Staphylococcal Enterotoxin B-Induced Acute Lung Injury through Alterations in the Expression of MicroRNA that Target Apoptosis and Cell-Cycle Arrest in Activated T Cells             | 10.1124/jpet.115.226563             | Article             | 2016                | Not focused on cancer                                                                                                         |
| 37P Breast cancer immunopeptidomes reveal a large number of targetable tumor antigens                                                                                                                                   |                                     | Conference Abstract | 2022                | Not an original study                                                                                                         |
| A "Lymphocyte MicroRNA Signature" as Predictive Biomarker of Immunotherapy Response and Plasma PD-1/PD-L1 Expression Levels in Patients with Metastatic Renal Cell Carcinoma: Pointing towards Epigenetic Reprogramming | 10.3390/cancers12113396             | Article             | 2020                | Article included in qualitative synthesis                                                                                     |
| A brand new era of cancer immunotherapy: breakthroughs and challenges                                                                                                                                                   | 10.1097/CM9.0000000000001490        | Review              | 2021                | Not an original study                                                                                                         |
| A Cell Component-Related Prognostic Signature for Head and Neck Squamous Cell Carcinoma Based on the Tumor Microenvironment                                                                                             | 10.1155/2022/6022869                | Article             | 2022                | Not focused on ICIs                                                                                                           |
| A comparative view on molecular alterations and potential therapeutic strategies for canine oral melanoma                                                                                                               | 10.3390/vetsci8110286               | Review              | 2021                | Not an original study                                                                                                         |
| A Differentiation-Related Gene Prognostic Index Contributes to Prognosis and Immunotherapy Evaluation in Patients with Hepatocellular Carcinoma                                                                         | 10.3390/cells11152302               | Article             | 2022                | Not focused on miRNAs                                                                                                         |
| A distinct metabolic response characterizes sensitivity to EZH2 inhibition in multiple myeloma                                                                                                                          | 10.1038/s41419-021-03447-8          | Article             | 2021                | Not focused on ICIs                                                                                                           |
| A Ferroptosis-Related Prognostic Risk Score Model to Predict Clinical Significance and Immunogenic Characteristics in Glioblastoma Multiforme                                                                           | 10.1155/2021/9107857                | Article             | 2021                | Not focused on miRNAs                                                                                                         |
| A first-in-human study of the anti-LAG-3 antibody fevezelimab plus pembrolizumab in previously treated, advanced microsatellite stable colorectal cancer                                                                | 10.1016/j.esmoop.2022.100639        | Article             | 2022                | Not focused on miRNAs                                                                                                         |
| A Glimpse in the Future of Malignant Mesothelioma Treatment                                                                                                                                                             | 10.3389/fphar.2021.809337           | Review              | 2021                | Not an original study                                                                                                         |
| A Holistic Perspective: Exosomes Shuttle between Nerves and Immune Cells in the Tumor Microenvironment                                                                                                                  | 10.3390/crm9113529                  | Review              | 2020                | Not an original study                                                                                                         |
| A Lymphocyte MicroRNA Signature as Predictive Biomarker of Immunotherapy Response and Plasma PD-1/PD-L1 Expression Levels in Patients with Metastatic Renal Cell Carcinoma: Pointing towards Epigenetic Reprogramming   |                                     | Article             | 2020                | Not experimentally demonstrating a direct association between the ICI effect on changes in the levels of miRNAs or vice versa |
| A novel immune resistance mechanism of melanoma cells controlled by the ADAR1 enzyme                                                                                                                                    | 10.18632/oncotarget.4905            | Article             | 2015                | Not experimentally demonstrating a direct association between the ICI effect on changes in the levels of miRNAs or vice versa |
| A Novel m6A-Related LncRNA Signature for Predicting Prognosis, Chemotherapy and Immunotherapy Response in Patients with Lung Adenocarcinoma                                                                             |                                     | Article             | 2022                | Not experimentally demonstrating a direct association between the ICI effect on changes in the levels of miRNAs or vice versa |
| A Novel PS3 Nanomedicine Reduces Immunosuppression and Augments Anti-PD-1 Therapy for Non-Small Cell Lung Cancer in Syngeneic Mouse Models                                                                              | 10.3390/cells121213434              | Article             | 2022                | Not experimentally demonstrating a direct association between the ICI effect on changes in the levels of miRNAs or vice versa |
| A novel risk prediction model of pyroptosis-related genes for the prognosis and immunotherapy response of endometrial cancer                                                                                            | 10.26355/eurrev_202204_28456        | Article             | 2022                | Full text unavailable                                                                                                         |
| A panel of seven immune-related genes can serve as a good predictive biomarker for cervical squamous cell carcinoma                                                                                                     | 10.3389/fgene.2022.1024508          | Article             | 2022                | Not focused on miRNAs                                                                                                         |
| A phase 2 trial of trifluridine/tipiracil plus nivolumab in patients with heavily pretreated microsatellite-stable metastatic colorectal cancer                                                                         | 10.1002/cam4.3630                   | Article             | 2021                | Not focused on miRNAs                                                                                                         |
| A Pilot Study Comparing the Efficacy of Lactate Dehydrogenase Levels Versus Circulating Cell-Free microRNAs in Monitoring Responses to Checkpoint Inhibitor Immunotherapy in Metastatic Melanoma Patients               | 10.3390/cancers12113361             | Article             | 2020                | Article included in qualitative synthesis                                                                                     |
| A scoping review on the potentiality of PD-L1-inhibiting microRNAs in treating colorectal cancer: Toward single-cell sequencing-guided biocompatible-based delivery                                                     | 10.1016/j.biopha.2021.112213        | Review              | 2021                | Not an original study                                                                                                         |
| A six-miRNA signature as a novel biomarker for improving prediction of prognosis and patterns of immune infiltration in hepatocellular carcinoma                                                                        |                                     | Article             | 2022                | Not focused on ICIs                                                                                                           |
| A Systematic Review on the Therapeutic Potentiality of PD-L1-inhibiting MicroRNAs for Triple-Negative Breast Cancer: Toward Single-Cell Sequencing-Guided Biomimetic Delivery                                           | 10.3390/genes12081206               | Review              | 2021                | Not an original study                                                                                                         |
| A Transcription Factor Signature Can Identify the CMS4 Subtype and Stratify the Prognostic Risk of Colorectal Cancer                                                                                                    | 10.3389/fonc.2022.902974            | Article             | 2022                | Not focused on miRNAs                                                                                                         |
| ACKR4 in tumor cells regulates dendritic cell migration to tumor-draining lymph nodes and T-cell priming                                                                                                                | 10.3390/cancers13195021             | Article             | 2021                | Not experimentally demonstrating a direct association between the ICI effect on changes in the levels of miRNAs or vice versa |
| ADRENERGIC SIGNALING AUGMENTS CYTOTOXIC T CELL ANTI-TUMOR ACTIVITY IN P53 DEFICIENT CANCERS BY CXCL10 RELEASE                                                                                                           | 10.1136/jtc-2022-SITC2022.1462      | Conference Abstract | 2022                | Not an original study                                                                                                         |
| Adrenergic signaling augments cytotoxic T-cell anti-tumor function in p53-deficient head and neck cancer                                                                                                                |                                     | Conference Abstract | 2021                | Not an original study                                                                                                         |
| Advanced penile cancer presenting with renal failure                                                                                                                                                                    | 10.46883/ONC.2021.3507.0425         | Article             | 2021                | Not focused on miRNAs                                                                                                         |
| Advances in Biomarkers for Detecting Early Cancer Treatment-Related Cardiac Dysfunction                                                                                                                                 | 10.3389/fcvm.2021.753313            | Review              | 2021                | Not an original study                                                                                                         |
| Advances in Human Immune System Mouse Models for Personalized Treg-Based Immunotherapies                                                                                                                                | 10.3389/fimmu.2021.643544           | Review              | 2021                | Not an original study                                                                                                         |
| Advances in Next-Generation Sequencing Bioinformatics for Clinical Diagnostics: Taking Precision Oncology to the Next Level                                                                                             | 10.1016/j.yamp.2018.06.010          | Review              | 2018                | Not an original study                                                                                                         |
| Against the motion: Treatment intensification in stage III NSCLC is a dream rather than a reality?                                                                                                                      |                                     | Conference Abstract | 2018                | Not an original study                                                                                                         |
| Altered Expression of Epigenetic Modifiers Identifies Novel Biomarkers and Therapeutic Targets in AL Amyloidosis                                                                                                        | 10.1182/blood-2021-153532           | Meeting Abstract    | 2021                | Not an original study                                                                                                         |
| An exosomal mRNA signature as predictor of benefit from immune checkpoint inhibitors in non-small cell lung cancer                                                                                                      | 10.1016/j.annonc.2020.08.1591       | Meeting Abstract    | 2020                | Not an original study                                                                                                         |
| An exosomal mirna signature to predict outcomes of non-small cell lung cancer patients during treatment with nivolumab                                                                                                  | 10.1177/0300891620953388            | Conference Abstract | 2020                | Not an original study                                                                                                         |
| An immune relevant signature for predicting prognoses and immunotherapeutic responses in patients with muscle-invasive bladder cancer (MIBC)                                                                            | 10.1002/cam4.2942                   | Article             | 2020                | Not experimentally demonstrating a direct association between the ICI effect on changes in the levels of miRNAs or vice versa |
| An Integrated Immune-Related Bioinformatics Analysis in Glioma: Prognostic Signature's Identification and Multi-Omics Mechanisms' Exploration                                                                           | 10.3389/fgene.2022.889629           | Article             | 2022                | Not focused on ICIs                                                                                                           |
| An Update on the Molecular and Clinical Characteristics of Apocrine Carcinoma of the Breast                                                                                                                             | 10.1016/j.cbrc.2021.12.009          | Review              | 2022                | Not an original study                                                                                                         |
| Anti-tumor Drug Targets Analysis: Current Insight and Future Prospect                                                                                                                                                   | 10.2174/13894501209661904022145325  | Review              | 2019                | Not an original study                                                                                                         |
| Antitumor immunity is defective in T cell-specific microRNA-155-deficient mice and is rescued by immune checkpoint blockade                                                                                             | 10.1074/jbc.M117.808121             | Article             | 2017                | Article included in qualitative synthesis                                                                                     |
| Apatinib combined with Keytruda treatment induces apoptosis of gastric carcinoma cells through CES4-miR-616-5p/DUSP2 axis                                                                                               | 10.1111/bcpt.13641                  | Article             | 2021                | Not experimentally demonstrating a direct association between the ICI effect on changes in the levels of miRNAs or vice versa |
| ARNTL2 is an indicator of poor prognosis, promotes epithelial-to-mesenchymal transition and inhibits ferroptosis in lung adenocarcinoma                                                                                 | 10.1016/j.tranon.2022.101562        | Article             | 2022                | Not focused on miRNAs                                                                                                         |
| Assessment and Management of Cardiotoxicity in Hematologic Malignancies                                                                                                                                                 | 10.1155/2021/6616265                | Review              | 2021                | Not an original study                                                                                                         |
| Association of Circular RNA and Long Non-Coding RNA Dysregulation with the Clinical Response to Immune Checkpoint Blockade in Cutaneous Metastatic Melanoma                                                             | 10.3390/biomedicines10102419        | Article             | 2022                | Not experimentally demonstrating a direct association between the ICI effect on changes in the levels of miRNAs or vice versa |
| Autoimmune Complications in Hematologic Neoplasms                                                                                                                                                                       | 10.3390/cancers13071532             | Review              | 2021                | Not an original study                                                                                                         |
| Autoimmunity in Acute Myocarditis: How Immunopathogenesis Steers New Directions for Diagnosis and Treatment                                                                                                             | 10.1007/s11886-020-01278-1          | Review              | 2020                | Not an original study                                                                                                         |
| Autophagy blockade potentiates cancer-associated immunosuppression through programmed death ligand-1 upregulation in bladder cancer                                                                                     | 10.1002/cp.30817                    | Article             | 2022                | Not experimentally demonstrating a direct association between the ICI effect on changes in the levels of miRNAs or vice versa |
| Biliary Tract Cancers: Treatment Updates and Future Directions in the Era of Precision Medicine and Immuno-Oncology                                                                                                     | 10.3389/fonc.2021.768009            | Review              | 2021                | Not an original study                                                                                                         |
| Bioinformatics-Based Analysis: Noncoding RNA-Mediated COL10A1 Is Associated with Poor Prognosis and Immune Cell Infiltration in Pancreatic Cancer                                                                       | 10.1155/2022/7904982                | Article             | 2022                | Not focused on ICIs                                                                                                           |
| Biological effects of COVID-19 on lung cancer: Can we drive our decisions                                                                                                                                               | 10.3389/fonc.2022.1029830           | Review              | 2022                | Not an original study                                                                                                         |
| Biomarkers for hepatocellular carcinoma: What's new on the horizon?                                                                                                                                                     | 10.3748/wjg.v24.i35.3974            | Review              | 2018                | Not an original study                                                                                                         |
| Biomarkers in Immunotherapy-Based Precision Treatments of Digestive System Tumors                                                                                                                                       | 10.3389/fonc.2021.650481            | Review              | 2021                | Not an original study                                                                                                         |
| Blocking IL-17A enhances tumor response to anti-PD-1 immunotherapy in microsatellite stable colorectal cancer                                                                                                           | 10.1136/jtc-2020-001695             | Article             | 2021                | Article included in qualitative synthesis                                                                                     |
| Blood-based mRNA, exosomal PD-L1, and immune profiling analysis as predictive biomarkers for immune checkpoint inhibitor treatment response in urothelial cancer                                                        | 10.1200/JCO.2022.40.16_suppl.e16559 | Conference Abstract | 2022                | Not an original study                                                                                                         |
| Bone and soft tissue tumors: New treatment approaches                                                                                                                                                                   | 10.3390/cancers13081832             | Editorial           | 2021                | Not an original study                                                                                                         |
| Breast cancer cell-derived microRNA-155 suppresses tumor progression via enhancing immune cell recruitment and antitumor function                                                                                       | 10.1172/JCI157248                   | Article             | 2022                | Article included in qualitative synthesis                                                                                     |
| CA9-Related Acidic Microenvironment Mediates CD8+ T Cell Related Immunosuppression in Pancreatic Cancer                                                                                                                 | 10.3389/fonc.2021.832315            | Article             | 2022                | Not focused on miRNAs                                                                                                         |
| Cancer immunotherapy by blocking immune checkpoints on innate lymphocytes                                                                                                                                               | 10.3390/cancers12123504             | Review              | 2020                | Not an original study                                                                                                         |
| CAR-T cell combination therapy: the next revolution in cancer treatment                                                                                                                                                 | 10.1186/s12935-022-02778-6          | Review              | 2022                | Not an original study                                                                                                         |
| Cardiac Biomarkers in Patients with Cancer: Considerations, Clinical Implications, and Future Avenues                                                                                                                   | 10.1007/s11912-020-00930-x          | Review              | 2020                | Not an original study                                                                                                         |
| Cardiovascular toxic effects of anti tumor agents: Pathogenetic mechanisms                                                                                                                                              | 10.1016/j.thromres.2021.12.017      | Article             | 2022                | Not experimentally demonstrating a direct association between the ICI effect on changes in the levels of miRNAs or vice versa |
| CASC1 Expression in Bladder Cancer Is Regulated by Exosomal miRNA-150: A Comprehensive Pan-Cancer and Bioinformatics Study                                                                                              | 10.1155/2022/8100325                | Article             | 2022                | Not experimentally demonstrating a direct association between the ICI effect on changes in the levels of miRNAs or vice versa |
| CDK7 Inhibition Potentiates Genome Instability Triggering Anti-tumor Immunity in Small Cell Lung Cancer                                                                                                                 |                                     | Article             | 2020                | Not focused on miRNAs                                                                                                         |
| Challenges for better diagnosis and management of pancreatic and biliary tract cancers focusing on blood biomarkers: A systematic review                                                                                | 10.3390/cancers13164220             | Review              | 2021                | Not an original study                                                                                                         |
| Characterization of cancer genomic heterogeneity by next-generation sequencing advances precision medicine in cancer treatment                                                                                          | 10.1093/pcomedi/ply007              | Review              | 2018                | Not an original study                                                                                                         |
| Characterization of the Prognostic m6A-Related lncRNA Signature in Gastric Cancer                                                                                                                                       | 10.3389/fonc.2021.630260            | Article             | 2021                | Not focused on miRNAs                                                                                                         |
| Cholangiocarcinoma: The role of genetic and epigenetic factors; current and prospective treatment with checkpoint inhibitors and immunotherapy                                                                          |                                     | Review              | 2021                | Not an original study                                                                                                         |
| CircRNA-Based Cervical Cancer Prognosis Model, Immunological Validation and Drug Prediction                                                                                                                             | 10.3390/currenco129110633           | Article             | 2022                | Not experimentally demonstrating a direct association between the ICI effect on changes in the levels of miRNAs or vice versa |
| Circular RNA CELF1 drives immunosuppression and anti-PD1 therapy resistance in non-small cell lung cancer via the miR-491-5p/EGFR axis                                                                                  | 10.18632/aging.203576               | Article             | 2021                | Not experimentally demonstrating a direct association between the ICI effect on changes in the levels of miRNAs or vice versa |
| Circular RNA circMET drives immunosuppression and anti-PD1 therapy resistance in hepatocellular carcinoma via the miR-30-5p/snail/OPP4 axis                                                                             | 10.1186/s12943-020-01213-6          | Article             | 2020                | Not experimentally demonstrating a direct association between the ICI effect on changes in the levels of miRNAs or vice versa |
| Circular ma hsa_circ_0000190 facilitates the tumorigenesis and immune evasion by upregulating the expression of soluble pd-H1 in non-small-cell lung cancer                                                             | 10.3390/jms23010064                 | Article             | 2022                | Not focused on miRNAs                                                                                                         |
| Circulating Biomarkers of Response and Toxicity of Immunotherapy in Advanced Non-Small Cell Lung Cancer (NSCLC): A Comprehensive Review                                                                                 | 10.3390/cancers13081794             | Review              | 2021                | Not an original study                                                                                                         |
| Circulating microRNAs associated with prolonged overall survival in lung cancer patients treated with nivolumab                                                                                                         | 10.1080/0284186X.2018.1465585       | Article             | 2018                | Not experimentally demonstrating a direct association between the ICI effect on changes in the levels of miRNAs or vice versa |
| Circulating microRNAs predict the response to anti-PD-1 therapy in non-small cell lung cancer                                                                                                                           | 10.1016/j.ygeno.2019.11.019         | Article             | 2020                | Not experimentally demonstrating a direct association between the ICI effect on changes in the levels of miRNAs or vice versa |
| Circulating miRNAs and PD-L1 Tumor Expression Are Associated with Survival in Advanced NSCLC Patients Treated with Immunotherapy: a Prospective Study                                                                   | 10.1158/1078-0432.CCR-18-1981       | Article             | 2019                | Not experimentally demonstrating a direct association between the ICI effect on changes in the levels of miRNAs or vice versa |
| Cisplatin-induced immune modulation in ovarian cancer mouse models with distinct inflammation profiles                                                                                                                  |                                     | Article             | 2019                | Not focused on miRNAs                                                                                                         |
| Clinical immunology and immunotherapy for hepatocellular carcinoma: current progress and challenges                                                                                                                     | 10.1007/s12072-019-09967-y          | Review              | 2019                | Not an original study                                                                                                         |
| Clinicopathologic implications of CD8(+)/Foxp3(+) ratio and miR-574-3p/PD-L1 axis in spinal chordoma patients                                                                                                           |                                     | Article             | 2018                | Not experimentally demonstrating a direct association between the ICI effect on changes in the levels of miRNAs or vice versa |
| Combination Immunotherapy for Hepatocellular Carcinoma: Where Are We Currently?                                                                                                                                         | 10.1055/s-0040-1722646              | Article             | 2021                | Full text unavailable                                                                                                         |
| Combining Radiation Therapy with Immune Checkpoint Blockade for Central Nervous System Malignancies                                                                                                                     |                                     | Review              | 2016                | Not an original study                                                                                                         |
| COMPLEMENTing immunotherapy                                                                                                                                                                                             | 10.1038/s43018-022-00442-6          | Review              | 2022                | Not an original study                                                                                                         |
| Comprehensive Analyses of MELK-Associated ceRNA Networks Reveal a Potential Biomarker for Predicting Poor Prognosis and Immunotherapy Efficacy in Hepatocellular Carcinoma                                              | 10.3389/fcell.2022.824938           | Article             | 2022                | Not focused on the miRNA/ICI relationship                                                                                     |
| Comprehensive Analysis of Correlations in the Expression of mRNA Genes and Immune Checkpoint Genes in Bladder Cancer Cells                                                                                              | 10.3390/jms2052553                  | Article             | 2021                | Not experimentally demonstrating a direct association between the ICI effect on changes in the levels of miRNAs or vice versa |
| Comprehensive Analysis of m6A RNA Methylation Regulators and the Immune Microenvironment to Aid Immunotherapy in Pancreatic Cancer                                                                                      | 10.3389/fimmu.2021.769425           | Article             | 2021                | Not focused on miRNAs                                                                                                         |
| Comprehensive analysis of the relationship between competitive endogenous RNA (ceRNA) networks and tumor infiltrating-cells in hepatocellular carcinoma                                                                 |                                     | Article             | 2020                | Not experimentally demonstrating a direct association between the ICI effect on changes in the levels of miRNAs or vice versa |
| Comprehensive analysis of tumor immune microenvironment and prognosis of m6A-related lncRNAs in gastric cancer                                                                                                          | 10.1186/s12885-022-09377-8          | Article             | 2022                | Not experimentally demonstrating a direct association between the ICI effect on changes in the levels of miRNAs or vice versa |
| Comprehensive Analysis of VCAN Expression Profiles and Prognostic Values in HCC                                                                                                                                         | 10.3389/fgene.2022.900306           | Article             | 2022                | Not experimentally demonstrating a direct association between the ICI effect on changes in the levels of miRNAs or vice versa |
| Comprehensive and Integrative Genomic Characterization of Hepatocellular Carcinoma                                                                                                                                      | 10.1016/j.cell.2017.05.046          | Article             | 2017                | Not focused on the miRNA/ICI relationship                                                                                     |
| Comprehensive bioinformatics analysis of ribonucleoside diphosphate reductase subunit M2[RRM2] gene correlates with prognosis and tumor immunotherapy in pan-cancer                                                     | 10.18632/aging.204315               | Article             | 2022                | Not experimentally demonstrating a direct association between the ICI effect on changes in the levels of miRNAs or vice versa |
| Comprehensive Genomic Characterization of Tumor Microenvironment and Relevant Signature in Clear Cell Renal Cell Carcinoma                                                                                              | 10.3389/fonc.2022.749119            | Article             | 2022                | Not experimentally demonstrating a direct association between the ICI effect on changes in the levels of miRNAs or vice versa |
| Comprehensive Transcriptome and Pathway Analyses Revealed Central Role for Fascin in Promoting Triple-Negative Breast Cancer Progression                                                                                | 10.3390/ph14121228                  | Article             | 2021                | Not focused on ICIs                                                                                                           |
| Conjunctival melanoma: New insights in tumour genetics and immunology, leading to new therapeutic options                                                                                                               | 10.1016/j.preteyres.2021.100971     | Review              | 2022                | Not an original study                                                                                                         |
| Conjunctival melanoma: Update on genetics, epigenetics and targeted molecular and immune-based therapies                                                                                                                | 10.2147/OPTH.S271569                | Review              | 2020                | Not an original study                                                                                                         |
| Construction of a ceRNA network in hepatocellular carcinoma and comprehensive analysis of immune infiltration patterns                                                                                                  |                                     | Article             | 2021                | Not experimentally demonstrating a direct association between the ICI effect on changes in the levels of miRNAs or vice versa |
| Construction of a paclitaxel-related competitive endogenous RNA network and identification of a potential regulatory axis in pancreatic cancer                                                                          | 10.1016/j.tranon.2022.101419        | Article             | 2022                | Not experimentally demonstrating a direct association between the ICI effect on changes in the levels of miRNAs or vice versa |
| Correction: Metabolism and epigenetic interplay in cancer: Regulation and putative therapeutic targets (Frontiers in Genetics (2019) DOI: 10.3389/fgene.2018.00427)                                                     | 10.3389/fgene.2019.000784           | Article             | 2019                | Not focused on ICIs                                                                                                           |
| Correlation of plasma exosomal microRNAs with the efficacy of immunotherapy in EGFR/ALK wild-type advanced non-small cell lung cancer                                                                                   | 10.1136/jtc-2019-000376             | Article             | 2020                | Not experimentally demonstrating a direct association between the ICI effect on changes in the levels of miRNAs or vice versa |
| Crosstalk between non-coding RNAs expression profile, drug resistance and immune response in breast cancer                                                                                                              | 10.1016/j.phrs.2021.106041          | Review              | 2022                | Not an original study                                                                                                         |
| CTNNB1 mutation suppresses infiltration of immune cells in hepatocellular carcinoma through miRNA-mediated regulation of chemokine expression                                                                           | 10.1016/j.intimp.2020.107043        | Article             | 2020                | Not experimentally demonstrating a direct association between the ICI effect on changes in the levels of miRNAs or vice versa |
| Current and Future Perspectives of PD-1/PDL-1 Blockade in Cancer Immunotherapy                                                                                                                                          | 10.1155/2021/6661406                | Review              | 2021                | Not an original study                                                                                                         |
| Current concepts of non-coding RNA regulation of immune checkpoints in cancer                                                                                                                                           | 10.1016/j.mam.2019.09.007           | Review              | 2019                | Not an original study                                                                                                         |
| Cutaneous Angiosarcomas: Molecular Pathogenesis Guides Novel Therapeutic Approaches                                                                                                                                     | 10.1111/dsdg.14694                  | Review              | 2022                | Not an original study                                                                                                         |
| Data-driven miRNA classifier as response predictor for immune checkpoint inhibitor treatment in advanced-stage cancer patients                                                                                          | 10.1093/annonc/mdz438.004           | Conference Abstract | 2019                | Not an original study                                                                                                         |
| Dendritic Cell-Derived exosomes increase the efficacy of anti-PD-L1 antibody in melanoma model                                                                                                                          | 10.1111/cas.13904                   | Conference Abstract | 2018                | Not an original study                                                                                                         |
| Determinants of resistance to VEGF-TKI and immune checkpoint inhibitors in metastatic renal cell carcinoma                                                                                                              | 10.1186/s13046-021-01961-3          | Review              | 2021                | Not an original study                                                                                                         |
| Development and Validation of a Robust Ferroptosis-Related Gene Panel for Breast Cancer Disease-Specific Survival                                                                                                       | 10.3389/fcell.2021.709180           | Article             | 2021                | Not focused on the miRNA/ICI relationship                                                                                     |
| Development of a Novel Immune Infiltration-Based Gene Signature to Predict Prognosis and Immunotherapy Response of Patients With Cervical Cancer                                                                        | 10.3389/fimmu.2021.709493           | Article             | 2021                | Not focused on miRNAs                                                                                                         |
| Development of a potential biomarker for PDL1 expression in lung carcinoma                                                                                                                                              | 10.1111/resp.14150                  | Conference Abstract | 2021                | Not an original study                                                                                                         |
| Development of a Prognostic Model Based on Pyroptosis-Related Genes in Pancreatic Adenocarcinoma                                                                                                                        | 10.1155/2022/9141117                | Article             | 2022                | Not focused on the miRNA/ICI relationship                                                                                     |
| Development of group b coxsackievirus as an oncolytic virus: Opportunities and challenges                                                                                                                               | 10.3390/v13061082                   | Review              | 2021                | Not an original study                                                                                                         |
| Diagnostic and therapeutic applications of miRNA-based strategies to cancer immunotherapy                                                                                                                               |                                     | Review              | 2018                | Not an original study                                                                                                         |
| Disentangling the therapeutic tactics in GBM: From bench to bedside and beyond                                                                                                                                          |                                     | Review              | 2021                | Not an original study                                                                                                         |
| Disorder of G2-M Checkpoint Control in Aniline-Induced Cell Proliferation in Rat Spleen                                                                                                                                 | 10.1002/cbin.11484                  | Review              | 2021                | Not an original study                                                                                                         |
| Disruption of Cell-Cell Communication in Anaplastic Thyroid Cancer as an Immunotherapeutic Opportunity                                                                                                                  | 10.1371/journal.pone.0131457        | Article             | 2015                | Not focused on ICIs                                                                                                           |
| DNMT1 as a therapeutic target in pancreatic cancer: mechanisms and clinical implications                                                                                                                                | 10.1007/978-3-030-83282-7_2         | Chapter             | 2021                | Not an original study                                                                                                         |
| DNMT1: A key drug target in triple-negative breast cancer                                                                                                                                                               | 10.1007/s13402-020-00526-4          | Review              | 2020                | Not an original study                                                                                                         |
| Doxosahexanoic acid may inhibit immune evasion of colorectal cancer cells through targeting immune checkpoint and immunomodulator genes and their controlling microRNAs                                                 | 10.1016/j.sancancer.2020.05.010     | Review              | 2021                | Not an original study                                                                                                         |
| Downregulation of ZC3H13 by miR-362-3p/miR-425-5p is associated with a poor prognosis and adverse outcomes in hepatocellular carcinoma                                                                                  | 10.1002/biol.1842                   | Article             | 2022                | Not experimentally demonstrating a direct association between the ICI effect on changes in the levels of miRNAs or vice versa |
| Drivers of Gene Expression Dysregulation in Pancreatic Cancer                                                                                                                                                           | 10.18632/aging.203939               | Article             | 2022                | Not experimentally demonstrating a direct association between the ICI effect on changes in the levels of miRNAs or vice versa |
| EBAG9 silencing exerts an immune checkpoint function without aggravating adverse effects                                                                                                                                | 10.1016/j.trecan.2021.01.008        | Review              | 2021                | Not an original study                                                                                                         |
| EBV-associated gastric cancer evades T-cell immunity by PD-1/PD-L1 interactions                                                                                                                                         | 10.1016/j.ymhe.2022.07.009          | Article             | 2022                | Not focused on the miRNA/ICI relationship                                                                                     |
| Editorial: Biomarker Detection Algorithms and Tools for Medical Imaging or Omics Data                                                                                                                                   | 10.1007/s10120-018-0880-4           | Article             | 2019                | Not experimentally demonstrating a direct association between the ICI effect on changes in the levels of miRNAs or vice versa |
| Editorial: Biomarkers of Immune-Checkpoint-Inhibitor Immunotherapies in Hepatocellular Carcinomas                                                                                                                       | 10.3389/fgene.2022.919390           | Editorial           | 2022                | Not an original study                                                                                                         |
| Editorial: Cancer evolution: From biological insights to therapeutic opportunities                                                                                                                                      | 10.3389/fonc.2022.860964            | Editorial           | 2022                | Not an original study                                                                                                         |
| Editorial: Clinical and pathogenic novelties in cholangiopathies: New treatments and many more to come                                                                                                                  | 10.3389/fgene.2022.984032           | Editorial           | 2022                | Not an original study                                                                                                         |
| Editorial: DNA Methylation Dynamics and Human Diseases                                                                                                                                                                  | 10.1097/MOG.0000000000000804        | Editorial           | 2022                | Not an original study                                                                                                         |
| Editorial: Eicosanoids in Cancer                                                                                                                                                                                        | 10.3389/fcell.2022.956286           | Editorial           | 2022                | Not an original study                                                                                                         |
| Editorial: Emerging Biomarkers for NSCLC: Recent Advances in Diagnosis and Therapy                                                                                                                                      | 10.3389/fphar.2021.765214           | Editorial           | 2021                | Not an original study                                                                                                         |
| Editorial: Genetic and Epigenetic Control of Immune Responses                                                                                                                                                           | 10.3389/fonc.2021.694578            | Editorial           | 2021                | Not an original study                                                                                                         |
| Editorial: Head & Neck Cancer and Esophageal Cancer: From Biosignatures to Therapeutics                                                                                                                                 | 10.3389/fimmu.2021.775101           | Editorial           | 2021                | Not an original study                                                                                                         |
| Editorial: Role of epigenetic regulators in the initiation, progression, and metastasis of cancer                                                                                                                       | 10.3389/fonc.2021.666103            | Editorial           | 2021                | Not an original study                                                                                                         |
| Editorial: Therapeutic Opportunities and Innovative Biomarkers in Tumor Microenvironment                                                                                                                                | 10.3389/fgene.2022.978097           | Editorial Material  | 2022                | Not an original study                                                                                                         |
| Editorial: Tumor microenvironment signaling networks in pathophysiology and therapeutics                                                                                                                                | 10.3389/fonc.2021.803414            | Editorial           | 2021                | Not an original study                                                                                                         |
| Effect of radiotherapy on T cell and PD-1 / PD-L1 blocking therapy in tumor microenvironment                                                                                                                            | 10.3389/fonc.2022.1009187           | Editorial           | 2022                | Not an original study                                                                                                         |
| Effects of helicobacter pylori on tumor microenvironment and immunotherapy responses                                                                                                                                    | 10.1080/21645515.2020.1840254       | Review              | 2021                | Not an original study                                                                                                         |
| Effects of microbiota on anticancer drugs: Current knowledge and potential applications                                                                                                                                 | 10.3389/fimmu.2022.923477           | Review              | 2022                | Not an original study                                                                                                         |
| Effects of microenvironment in osteosarcoma on chemoresistance and the promise of immunotherapy as an osteosarcoma therapeutic modality                                                                                 | 10.1016/j.abiom.2022.104197         | Review              | 2022                | Not an original study                                                                                                         |
| Efficacy of pembrolizumab in patients with advanced cancer of unknown primary (CUP): a phase 2 non-randomized clinical trial                                                                                            | 10.3389/fimmu.2022.871076           | Review              | 2022                | Not an original study                                                                                                         |
| EGFR signaling pathway as therapeutic target in human cancers                                                                                                                                                           | 10.1136/jtc-2022-004822             | Article             | 2022                | Not focused on miRNAs                                                                                                         |
| Emerging Blood-Based Biomarkers for Predicting Immunotherapy Response in NSCLC                                                                                                                                          | 10.1016                             |                     |                     |                                                                                                                               |



|                                                                                                                                                                                                                |                                    |                         |      |                                                                                                                               |
|----------------------------------------------------------------------------------------------------------------------------------------------------------------------------------------------------------------|------------------------------------|-------------------------|------|-------------------------------------------------------------------------------------------------------------------------------|
| Emerging Challenges of Radiation-Associated Cardiovascular Dysfunction (RACVD) in Modern Radiation Oncology: Clinical Practice, Bench Investigation, and Multidisciplinary Care                                | 10.3389/fcvm.2020.00016            | Review                  | 2020 | Not an original study                                                                                                         |
| Emerging drugs for the treatment of cutaneous T-cell lymphoma                                                                                                                                                  | 10.1089/14728214.2022.2049233      | Review                  | 2022 | Not an original study                                                                                                         |
| Emerging role of extracellular vesicles in immune regulation and cancer progression                                                                                                                            | 10.3390/cancers12123563            | Review                  | 2020 | Not an original study                                                                                                         |
| Emerging Role of Non-Coding RNAs in Regulation of T-Lymphocyte Function                                                                                                                                        | 10.3389/fimmu.2021.756042          | Review                  | 2021 | Not an original study                                                                                                         |
| Emerging role of RNA interference in immune cells engineering and its therapeutic synergism in immunotherapy                                                                                                   |                                    | Review                  | 2021 | Not an original study                                                                                                         |
| Emerging Therapeutic Targets in Chordomas: A Review of the Literature in the Genomic Era                                                                                                                       | 10.1093/neuros/nyz342              | Review                  | 2020 | Not an original study                                                                                                         |
| Engineered extracellular vesicles: potentials in cancer combination therapy                                                                                                                                    | 10.1186/s12951-022-01330-y         | Review                  | 2022 | Not an original study                                                                                                         |
| Epi-immunotherapy for cancers: rationales of epi-drugs in combination with immunotherapy and advances in clinical trials                                                                                       | 10.1002/cac2.12313                 | Review                  | 2022 | Not an original study                                                                                                         |
| Epigenetic Mechanisms of Resistance to Immune Checkpoint Inhibitors                                                                                                                                            | 10.3390/biom10071061               | Review                  | 2020 | Not an original study                                                                                                         |
| Epigenetic modifications: Critical participants of the PD-L1 regulatory mechanism in solid tumors (Review)                                                                                                     | 10.3892/lip.2022.5424              | Review                  | 2022 | Not an original study                                                                                                         |
| Epigenetic regulation of immune checkpoints: another target for cancer immunotherapy?                                                                                                                          | 10.2217/mt-2016-0111               | Review                  | 2017 | Not an original study                                                                                                         |
| Epigenetic regulators of programmed death-ligand 1 expression in human cancers                                                                                                                                 | 10.1016/j.trsl.2018.05.011         | Review                  | 2018 | Not an original study                                                                                                         |
| Epigenetics in Health and Disease                                                                                                                                                                              | 10.1007/978-961-15-3449-2_1        | Editorial Material; Boc | 2020 | Not an original study                                                                                                         |
| Epigenomic alterations in cancer: mechanisms and therapeutic potential                                                                                                                                         | 10.1042/CS20210449                 | Review                  | 2022 | Not an original study                                                                                                         |
| Epitranscriptomic Approach: To Improve the Efficacy of ICB Therapy by Co-Targeting Intracellular Checkpoint CISH                                                                                               | 10.3390/cells10092250              | Review                  | 2021 | Not an original study                                                                                                         |
| Epstein-Barr virus-encoded miR-BART5-5p upregulates PD-L1 through PIAS3/pSTAT3 modulation, worsening clinical outcomes of PD-L1-positive gastric carcinomas                                                    | 10.1007/s10120-020-01059-3         | Article                 | 2020 | Not experimentally demonstrating a direct association between the ICI effect on changes in the levels of miRNAs or vice versa |
| Epstein-Barr Virus Epithelial Cancers—A Comprehensive Understanding to Drive Novel Therapies                                                                                                                   | 10.3389/fimmu.2021.734293          | Review                  | 2021 | Not an original study                                                                                                         |
| Essential updates 2017/2018: Recent topics in the treatment and research of gastric cancer in Japan                                                                                                            | 10.1002/ags3.12894                 | Review                  | 2019 | Not an original study                                                                                                         |
| Evaluate the diagnostic and prognostic value of NUSAP1 in papillary thyroid carcinoma and identify the relationship with genes, proteins, and immune factors                                                   | 10.1186/s12957-022-02652-9         | Article                 | 2022 | Not experimentally demonstrating a direct association between the ICI effect on changes in the levels of miRNAs or vice versa |
| Evaluating prognostic value and relevant gene signatures of tumor microenvironment characterization in esophageal carcinoma                                                                                    | 10.21237/go-21-371                 | Article                 | 2021 | Not experimentally demonstrating a direct association between the ICI effect on changes in the levels of miRNAs or vice versa |
| Evaluation of circular RNA profiling in metastatic melanoma patients treated with immune checkpoint blockade                                                                                                   |                                    | Conference Abstract     | 2020 | Not an original study                                                                                                         |
| Evolving Role of Oncolytic Virotherapy: Challenges and Prospects in Clinical Practice                                                                                                                          |                                    | Review                  | 2021 | Not an original study                                                                                                         |
| Exosomal circCMTM3 promotes the pathogenesis of hepatocellular carcinoma via angiogenesis                                                                                                                      | 10.1111/hepr.13719                 | Editorial               | 2021 | Not an original study                                                                                                         |
| Exosomal miRNA-146a is downregulated in clear cell renal cell carcinoma patients with severe immune-related adverse events                                                                                     | 10.1016/j.ncrna.2022.06.004        | Article                 | 2022 | Not experimentally demonstrating a direct association between the ICI effect on changes in the levels of miRNAs or vice versa |
| Exosome miR-27a-3p secreted from adipocytes targets ICOS to promote antitumor immunity in lung adenocarcinoma                                                                                                  | 10.1111/1759-7714.13411            | Article                 | 2020 | Not experimentally demonstrating a direct association between the ICI effect on changes in the levels of miRNAs or vice versa |
| Exosome-derived miR-142-5p remodels lymphatic vessels and induces IDO to promote immune privilege in the tumour microenvironment                                                                               | 10.1038/s41418-020-00618-6         | Article                 | 2021 | Not experimentally demonstrating a direct association between the ICI effect on changes in the levels of miRNAs or vice versa |
| Exosomes carrying immune checkpoints, a promising therapeutic approach in cancer treatment                                                                                                                     | 10.1007/s12032-022-01781-1         | Review                  | 2022 | Not an original study                                                                                                         |
| Exploration of Redox-Related Molecular Patterns and the Redox Score for Prostate Cancer                                                                                                                        | 10.1155/2021/4548594               | Article                 | 2021 | Not focused on the miRNA/ICI relationship                                                                                     |
| Exploring microsatellite instability in patients with advanced hepatocellular carcinoma and its tumor microenvironment                                                                                         | 10.1002/gh3.12660                  | Article                 | 2021 | Not focused on ICIs                                                                                                           |
| Expression of PD-L1 in EBV-associated malignancies                                                                                                                                                             | 10.1016/j.intimp.2021.107553       | Review                  | 2021 | Not an original study                                                                                                         |
| Expression patterns of platinum resistance-related genes in lung adenocarcinoma and related clinical value models                                                                                              | 10.3389/fgene.2022.993322          | Article                 | 2022 | Not focused on the miRNA/ICI relationship                                                                                     |
| Extracellular Vesicles as Mediators of Therapy Resistance in the Breast Cancer Microenvironment                                                                                                                | 10.3390/biom12010132               | Review                  | 2022 | Not an original study                                                                                                         |
| Extracellular vesicles in tumor diagnosis: A mini-review                                                                                                                                                       | 10.2174/1573405616686201209103154  | Short Survey            | 2021 | Not an original study                                                                                                         |
| Extracellular vesicles released by CD40/IL-4-stimulated CLL cells confer altered functional properties to CD4(+) T cells                                                                                       |                                    | Article                 | 2016 | Not experimentally demonstrating a direct association between the ICI effect on changes in the levels of miRNAs or vice versa |
| Extranodal natural killer/T-cell lymphoma, nasal type: Basic science and clinical progress                                                                                                                     | 10.3389/fped.2019.00141            | Review                  | 2019 | Not an original study                                                                                                         |
| Fascin in gynecological cancers: An update of the literature                                                                                                                                                   | 10.3390/cancers13225760            | Review                  | 2021 | Not an original study                                                                                                         |
| Ferroptosis: A New Promising Target for Ovarian Cancer Therapy                                                                                                                                                 | 10.7150/ljms.76480                 | Review                  | 2022 | Not an original study                                                                                                         |
| Fibroblast-derived LPP as a biomarker for treatment response and therapeutic target in gastric cancer                                                                                                          | 10.1016/j.onto.2022.01.008         | Article                 | 2022 | Not experimentally demonstrating a direct association between the ICI effect on changes in the levels of miRNAs or vice versa |
| First-line immunotherapy or angiogenesis inhibitor plus chemotherapy for HER2-altered NSCLC: a retrospective real-world POLISH study                                                                           | 10.1177/17588359221082339          | Article                 | 2022 | Not focused on miRNAs                                                                                                         |
| Focus on PD-1/PD-L1 as a Therapeutic Target in Ovarian Cancer                                                                                                                                                  | 10.3390/ljms232012067              | Review                  | 2022 | Not an original study                                                                                                         |
| From COPD to Lung Cancer: Mechanisms Linking, Diagnosis, Treatment, and Prognosis                                                                                                                              | 10.2147/COPD.S380732               | Review                  | 2022 | Not an original study                                                                                                         |
| From Liver Cirrhosis to Cancer: The Role of Micro-RNAs in Hepatocarcinogenesis                                                                                                                                 | 10.3390/ljms22031492               | Review                  | 2021 | Not an original study                                                                                                         |
| Fueling immune checkpoint blockade with oncolytic viruses: Current paradigms and challenges ahead                                                                                                              | 10.1016/j.canlet.2022.215937       | Review                  | 2022 | Not an original study                                                                                                         |
| Futuristic approach to cancer treatment                                                                                                                                                                        | 10.1016/j.gene.2021.145906         | Review                  | 2021 | Not an original study                                                                                                         |
| Gender specific eRNA TBX5-AS1 as the immunological biomarker for male patients with lung squamous cell carcinoma in pan-cancer screening                                                                       | 10.7717/peerj.12536                | Article                 | 2021 | Not experimentally demonstrating a direct association between the ICI effect on changes in the levels of miRNAs or vice versa |
| Gene signatures with therapeutic value: emerging perspective for personalized immunotherapy in renal cancer                                                                                                    | 10.2217/mt-2021-0187               | Review                  | 2021 | Not an original study                                                                                                         |
| Generation, secretion and degradation of cancer immunotherapy target PD-L1                                                                                                                                     | 10.1007/s00018-022-04431-x         | Review                  | 2022 | Not an original study                                                                                                         |
| Genetic and clinical characterization of B7-H3 (CD276) expression and epigenetic regulation in diffuse brain glioma                                                                                            | 10.1111/cas.13744                  | Article                 | 2018 | Not experimentally demonstrating a direct association between the ICI effect on changes in the levels of miRNAs or vice versa |
| Genetic and epigenetic strategies for advancing ovarian cancer immunotherapy                                                                                                                                   | 10.1089/14712598.2019.1602605      | Review                  | 2019 | Not an original study                                                                                                         |
| Genome Instability and Long Noncoding RNA Reveal Biomarkers for Immunotherapy and Prognosis and Novel Competing Endogenous RNA Mechanism in Colon Adenocarcinoma                                               | 10.3389/fcell.2021.740455          | Article                 | 2021 | Not experimentally demonstrating a direct association between the ICI effect on changes in the levels of miRNAs or vice versa |
| Genomic characterization of small cell bladder cancer                                                                                                                                                          |                                    | Conference Abstract     | 2020 | Not an original study                                                                                                         |
| Genomic, Pathway Network, and Immunologic Features Distinguishing Squamous Carcinomas                                                                                                                          | 10.1016/j.celrep.2018.03.063       | Article                 | 2018 | Not focused on the miRNA/ICI relationship                                                                                     |
| GN5A might be a novel prognostic immune-related biomarker of not only esophageal squamous cell carcinoma and other cancers                                                                                     | 10.1186/s12920-022-01223-x         | Article                 | 2022 | Not experimentally demonstrating a direct association between the ICI effect on changes in the levels of miRNAs or vice versa |
| Glycolysis-Related LINC02432/Hsa-miR-98-5p/HK2 Axis Inhibits Ferroptosis and Predicts Immune Infiltration, Tumor Mutation Burden, and Drug Sensitivity in Pancreatic Adenocarcinoma                            | 10.3389/fphar.2022.937413          | Article                 | 2022 | Not experimentally demonstrating a direct association between the ICI effect on changes in the levels of miRNAs or vice versa |
| Gut microbiota: a new player in regulating immune- and chemo-therapy efficacy                                                                                                                                  | 10.20517/cdr.2020.04               | Review                  | 2020 | Not an original study                                                                                                         |
| Gynocare update: Modern strategies to improve diagnosis and treatment of rare gynecologic tumors—current challenges and future directions                                                                      | 10.3390/cancers13030493            | Review                  | 2021 | Not an original study                                                                                                         |
| Harnessing the epigenome to boost immunotherapy response in non-small cell lung cancer patients                                                                                                                | 10.1177/17588359211006947          | Review                  | 2021 | Not an original study                                                                                                         |
| Harnessing the therapeutic potential of extracellular vesicles for cancer treatment                                                                                                                            | 10.1016/j.semcancer.2021.05.001    | Review                  | 2021 | Not an original study                                                                                                         |
| Harnessing tumorous flaws for immune supremacy: is miRNA-155 the weak link in breast cancer progression?                                                                                                       | 10.1172/JCI163010                  | Review                  | 2022 | Not an original study                                                                                                         |
| HCG18 Participates in Vascular Invasion of Hepatocellular Carcinoma by Regulating Macrophages and Tumor Stem Cells                                                                                             | 10.3389/fcell.2021.707073          | Article                 | 2021 | Not experimentally demonstrating a direct association between the ICI effect on changes in the levels of miRNAs or vice versa |
| Hepatocellular carcinoma: An overview of the changing landscape of treatment options                                                                                                                           | 10.2147/JHC.S300182                | Review                  | 2021 | Not an original study                                                                                                         |
| Hereditary diffuse gastric cancer therapeutic roadmap: current and novel approaches in a nutshell                                                                                                              | 10.1177/1758835920967238           | Review                  | 2020 | Not an original study                                                                                                         |
| HIF1α epigenetically repressed macrophages via CRISPR/Cas9-EZH2 system for enhanced cancer immunotherapy                                                                                                       | 10.1016/j.bioactmat.2021.02.008    | Article                 | 2021 | Not experimentally demonstrating a direct association between the ICI effect on changes in the levels of miRNAs or vice versa |
| High dose androgen suppresses natural killer cytotoxicity of castration-resistant prostate cancer cells via altering AR/circFKBP5/miRNA-513a-5p/PD-L1 signals                                                  | 10.1038/s41419-022-04956-w         | Article                 | 2022 | Not experimentally demonstrating a direct association between the ICI effect on changes in the levels of miRNAs or vice versa |
| HLA-G: Too Much or Too Little? Role in Cancer and Autoimmune Disease                                                                                                                                           | 10.3389/fimmu.2022.796054          | Review                  | 2022 | Not an original study                                                                                                         |
| Hsa_circ_0003222 accelerates stemness and progression of non-small cell lung cancer by sponging miR-527                                                                                                        | 10.1038/s41419-021-04095-8         | Article                 | 2021 | Not experimentally demonstrating a direct association between the ICI effect on changes in the levels of miRNAs or vice versa |
| Hsa-miR-9-5p-Mediated TSPAN9 Downregulation Is Positively Related to Both Poor Hepatocellular Carcinoma Prognosis and the Tumor Immune Infiltration                                                            | 10.1155/2022/9051229               | Article                 | 2022 | Not experimentally demonstrating a direct association between the ICI effect on changes in the levels of miRNAs or vice versa |
| Human endogenous retrovirus-H long terminal repeat-associating 2: The next immune checkpoint for antitumor therapy                                                                                             | 10.1016/j.ebiom.2022.103987        | Review                  | 2022 | Not an original study                                                                                                         |
| Hypoxia-Related lncRNA Correlates With Prognosis and Immune Microenvironment in Lower-Grade Glioma                                                                                                             | 10.3389/fimmu.2021.731048          | Article                 | 2021 | Not experimentally demonstrating a direct association between the ICI effect on changes in the levels of miRNAs or vice versa |
| Identification and characterization of novel CD274 (PD-L1) regulating microRNAs and their functional relevance in melanoma                                                                                     | 10.1002/ctm2.934                   | Article                 | 2022 | Article included in qualitative synthesis                                                                                     |
| Identification and functional characterization of the miRNA-gene regulatory network in chronic myeloid leukaemia lineage negative cells                                                                        | 10.1038/emph32493                  | Article                 | 2016 | Not focused on ICIs                                                                                                           |
| Identification and validation of a miRNA-related expression signature for tumor mutational burden in colorectal cancer                                                                                         | 10.1186/s12957-021-02137-1         | Article                 | 2021 | Not experimentally demonstrating a direct association between the ICI effect on changes in the levels of miRNAs or vice versa |
| Identification and Validation of an Immune-Related lncRNA Signature to Facilitate Survival Prediction in Gastric Cancer                                                                                        | 10.3389/fonc.2021.666064           | Article                 | 2021 | Not experimentally demonstrating a direct association between the ICI effect on changes in the levels of miRNAs or vice versa |
| Identification and Validation of Long Non-Coding RNA LCIAR as a Biomarker in LUAD                                                                                                                              | 10.3389/fonc.2022.933071           | Article                 | 2022 | Not experimentally demonstrating a direct association between the ICI effect on changes in the levels of miRNAs or vice versa |
| Identification of a competing endogenous RNA network related to immune signature in clear cell renal cell carcinoma                                                                                            |                                    | Article                 | 2021 | Not experimentally demonstrating a direct association between the ICI effect on changes in the levels of miRNAs or vice versa |
| Identification of a Ferroptosis-Related Long Noncoding RNA Prognostic Signature and Its Predictive Ability to Immunotherapy in Hepatocellular Carcinoma                                                        | 10.3389/fgene.2021.682082          | Article                 | 2021 | Not focused on miRNAs                                                                                                         |
| Identification of a miRNA-based non-invasive predictive biomarker of response to target therapy in BRAF-mutant melanoma                                                                                        | 10.7150/thno.77761                 | Article                 | 2022 | Not experimentally demonstrating a direct association between the ICI effect on changes in the levels of miRNAs or vice versa |
| Identification of a novel six autophagy-related genes signature for the prognostic and a miRNA-related autophagy predictor for anti-PD-1 therapy responses in prostate cancer                                  | 10.1186/s12885-020-07725-0         | Article                 | 2021 | Not experimentally demonstrating a direct association between the ICI effect on changes in the levels of miRNAs or vice versa |
| Identification of a pyroptosis-related lncRNA risk model for predicting prognosis and immune response in colon adenocarcinoma                                                                                  | 10.1186/s12957-022-02572-8         | Article                 | 2022 | Not experimentally demonstrating a direct association between the ICI effect on changes in the levels of miRNAs or vice versa |
| Identification of Autophagy Related circRNA-miRNA-mRNA-Subtypes Network With Radiotherapy Responses and Tumor Immune Microenvironment in Non-small Cell Lung Cancer                                            | 10.3389/fgene.2021.730003          | Article                 | 2021 | Not experimentally demonstrating a direct association between the ICI effect on changes in the levels of miRNAs or vice versa |
| Identification of CTLA-4 associated with tumor microenvironment and competing interactions in triple negative breast cancer by co-expression network analysis                                                  | 10.7150/ca.46301                   | Article                 | 2020 | Not experimentally demonstrating a direct association between the ICI effect on changes in the levels of miRNAs or vice versa |
| Identification of immune checkpoint inhibitors and biomarkers among STAT family in stomach adenocarcinoma                                                                                                      |                                    | Article                 | 2019 | Not experimentally demonstrating a direct association between the ICI effect on changes in the levels of miRNAs or vice versa |
| Identification of Immune Modulatory miRNAs by miRNA Enrichment via RNA Affinity Purification                                                                                                                   |                                    | Article                 | 2021 | Not experimentally demonstrating a direct association between the ICI effect on changes in the levels of miRNAs or vice versa |
| Identification of Immune-Related Genes for Establishment of Prognostic Index in Hepatocellular Carcinoma                                                                                                       | 10.3389/fcell.2021.760079          | Article                 | 2021 | Not experimentally demonstrating a direct association between the ICI effect on changes in the levels of miRNAs or vice versa |
| Identification of m6A modification patterns and development of m6A-hypoxia prognostic signature to characterize tumor microenvironment in triple-negative breast cancer                                        | 10.3389/fimmu.2022.978092          | Article                 | 2022 | Not focused on miRNAs                                                                                                         |
| Identification of MicroRNA-mRNA Networks in Melanoma and Their Association with PD-1 Checkpoint Blockade Outcomes                                                                                              | 10.3390/cancers13215301            | Article                 | 2021 | Not experimentally demonstrating a direct association between the ICI effect on changes in the levels of miRNAs or vice versa |
| Identification of microRNAs that target PD-L1 in mismatch repair-deficient colorectal cancer                                                                                                                   |                                    | Conference Abstract     | 2018 | Not an original study                                                                                                         |
| Identification of Novel Biomarkers for Predicting Prognosis and Immunotherapy Response in Head and Neck Squamous Cell Carcinoma Based on ceRNA Network and Immune Infiltration Analysis                        | 10.1155/2021/4532438               | Article                 | 2021 | Not experimentally demonstrating a direct association between the ICI effect on changes in the levels of miRNAs or vice versa |
| Identification of Novel Prognostic Signatures for Clear Cell Renal Cell Carcinoma Based on ceRNA Network Construction and Immune Infiltration Analysis                                                         | 10.1155/2022/4033583               | Article                 | 2022 | Not experimentally demonstrating a direct association between the ICI effect on changes in the levels of miRNAs or vice versa |
| Identification of serum microRNAs predicting the response of esophageal squamous-cell carcinoma to nivolumab                                                                                                   | 10.1093/icc/nyy146                 | Article                 | 2020 | Not experimentally demonstrating a direct association between the ICI effect on changes in the levels of miRNAs or vice versa |
| Identifies microtubule-binding protein CSPP1 as a novel cancer biomarker associated with ferroptosis and tumor microenvironment                                                                                |                                    | Article                 | 2022 | Not experimentally demonstrating a direct association between the ICI effect on changes in the levels of miRNAs or vice versa |
| Identifying tumor immunity-associated molecular features in liver hepatocellular carcinoma by multi-omics analysis                                                                                             | 10.3389/fmolb.2022.960457          | Article                 | 2022 | Not experimentally demonstrating a direct association between the ICI effect on changes in the levels of miRNAs or vice versa |
| IFN-I-tolerant oncolytic Semliki Forest virus in combination with anti-PD1 enhances T cell response against mouse glioma                                                                                       | 10.1016/j.onto.2021.03.008         | Article                 | 2021 | Not focused on miRNAs                                                                                                         |
| Immune checkpoint inhibitor induces cardiac injury through polarizing macrophages via modulating microRNA-34a/Kruppel-like factor 4 signaling                                                                  | 10.1038/s41419-020-02778-2         | Article                 | 2020 | Article included in qualitative synthesis                                                                                     |
| Immune checkpoint inhibitors as mediators for immunosuppression by cancer-associated fibroblasts: A comprehensive review                                                                                       | 10.3389/fimmu.2022.996145          | Review                  | 2022 | Not an original study                                                                                                         |
| Immune checkpoint inhibitors for genitourinary cancers: Treatment indications, investigational approaches and biomarkers                                                                                       | 10.3390/cancers13215415            | Review                  | 2021 | Not an original study                                                                                                         |
| Immune checkpoint inhibitors in HCC: Cellular, molecular and systemic data                                                                                                                                     | 10.1016/j.semcancer.2022.01.005    | Review                  | 2022 | Not an original study                                                                                                         |
| Immune checkpoints in osteosarcoma: Recent advances and therapeutic potential                                                                                                                                  | 10.1016/j.canlet.2022.215887       | Review                  | 2022 | Not an original study                                                                                                         |
| Immune Modulatory Short Noncoding RNAs Targeting the Glioblastoma Microenvironment                                                                                                                             | 10.3389/fonc.2021.682129           | Review                  | 2021 | Not an original study                                                                                                         |
| Immune Prophets of Lung Cancer: The Prognostic and Predictive Landscape of Cellular and Molecular Immune Markers                                                                                               | 10.1016/j.tranon.2018.04.006       | Review                  | 2018 | Not an original study                                                                                                         |
| Immunogenomic correlates of immune-related adverse events for anti-programmed cell death 1 therapy                                                                                                             | 10.3389/fimmu.2022.1032221         | Article                 | 2022 | Not focused on miRNAs                                                                                                         |
| Immunologic and tumor responses of pegloticakin with 5-FU/LV and oxaliplatin (FOLFOX) in pancreatic ductal adenocarcinoma (PDAC)                                                                               | 10.1007/s10637-020-01000-6         | Article                 | 2021 | Not focused on miRNAs                                                                                                         |
| Immunology Meets Bioengineering: Improving the Effectiveness of Glioblastoma Immunotherapy                                                                                                                     | 10.3390/cancers14153698            | Review                  | 2022 | Not an original study                                                                                                         |
| Immunomodulatory role for MicroRNAs: Regulation of PD-1/PD-L1 and CTLA-4 immune checkpoints expression                                                                                                         | 10.1016/j.gene.2020.144888         | Review                  | 2020 | Not an original study                                                                                                         |
| Immunotherapy and Gene Therapy for Oncoviruses Infections: A Review                                                                                                                                            | 10.3390/v13050822                  | Review                  | 2021 | Not an original study                                                                                                         |
| Immunotherapy of cholangiocarcinoma: Therapeutic strategies and predictive biomarkers                                                                                                                          | 10.1016/j.canlet.2022.215853       | Review                  | 2022 | Not an original study                                                                                                         |
| Improvement in survival end points of patients with metastatic renal cell carcinoma through sequential targeted therapy                                                                                        | 10.1016/j.ctrv.2016.09.002         | Review                  | 2016 | Not an original study                                                                                                         |
| Improving PARP inhibitor efficacy in high-grade serous ovarian carcinoma: A focus on the immune system                                                                                                         | 10.3389/fgene.2022.886170          | Review                  | 2022 | Not an original study                                                                                                         |
| Inflammatory microenvironment in the initiation and progression of bladder cancer                                                                                                                              | 10.18632/oncotarget.21565          | Review                  | 2017 | Not an original study                                                                                                         |
| Inflation of tumor mutation burden by tumor-only sequencing in under-represented groups                                                                                                                        | 10.1038/s41698-021-00164-5         | Article                 | 2021 | Not focused on miRNAs                                                                                                         |
| Inhibition of arginase by CB-1158 blocks myeloid cell-mediated immune suppression in the tumor microenvironment                                                                                                |                                    | Article                 | 2017 | Not focused on miRNAs                                                                                                         |
| Inhibition of CXCR4 by MicroRNA-1192 Reduces the Activation of Th17 Cells and Expression of Inflammation Factors in a Mouse Model of Vulvovaginal Candidiasis                                                  | 10.1159/000494475                  | Article                 | 2018 | Not focused on cancer                                                                                                         |
| Inhibition of PARP Potentiates Immune Checkpoint Therapy through miR-513/PD-L1 Pathway in Hepatocellular Carcinoma                                                                                             | 10.1155/2022/6988923               | Article                 | 2022 | Not experimentally demonstrating a direct association between the ICI effect on changes in the levels of miRNAs or vice versa |
| Innovative Therapy, Monoclonal Antibodies and Beyond                                                                                                                                                           | 10.1016/j.cytothr.2017.10.002      | Short Survey            | 2017 | Not an original study                                                                                                         |
| Insights into an immunotherapeutic approach to combat multidrug resistance in hepatocellular carcinoma                                                                                                         | 10.3390/ph14070656                 | Review                  | 2021 | Not an original study                                                                                                         |
| Insights into molecular therapy of glioma: current challenges and next generation blueprint                                                                                                                    | 10.1038/aps.2016.167               | Review                  | 2017 | Not an original study                                                                                                         |
| Integrated genomic analysis of recurrence-associated small non-coding RNAs in oesophageal cancer                                                                                                               | 10.1136/gutjnl-2015-311238         | Article                 | 2017 | Not experimentally demonstrating a direct association between the ICI effect on changes in the levels of miRNAs or vice versa |
| Integrated Multi-Omics Analysis Identified PTPRG and CHL1 as Key Regulators of Immunophenotypes in Clear Cell Renal Cell Carcinoma(ccRCC)                                                                      |                                    | Article                 | 2022 | Not experimentally demonstrating a direct association between the ICI effect on changes in the levels of miRNAs or vice versa |
| Integrated transcriptional-phenotypic analysis captures systemic immunomodulation following antiangiogenic therapy in renal cell carcinoma patients                                                            | 10.1002/ctm2.434                   | Article                 | 2021 | Not experimentally demonstrating a direct association between the ICI effect on changes in the levels of miRNAs or vice versa |
| Integrative analyses of prognosis, tumor immunity, and ceRNA network of the ferroptosis-associated gene FANCD2 in hepatocellular carcinoma                                                                     | 10.3389/fgene.2022.955225          | Article                 | 2022 | Not experimentally demonstrating a direct association between the ICI effect on changes in the levels of miRNAs or vice versa |
| Integrative Analysis of Multi-omics Data Identified EGFR and PTGS2 as Key Nodes in a Gene Regulatory Network Related to Immune Phenotypes in Head and Neck Cancer                                              | 10.1158/1078-0432.CCR-19-3997      | Article                 | 2020 | Not experimentally demonstrating a direct association between the ICI effect on changes in the levels of miRNAs or vice versa |
| Integrative cancer genomics in the era of precision cancer medicine                                                                                                                                            | 10.1038/s10038-021-00970-6         | Editorial Material      | 2021 | Not an original study                                                                                                         |
| Interaction of Gut Microbiome and Host microRNAs with the Occurrence of Colorectal and Breast Cancer and Their Impact on Patient Immunity                                                                      |                                    | Review                  | 2021 | Not an original study                                                                                                         |
| Interactome analysis of gene expression profiles identifies CD6c as a potential therapeutic target modified by miR-215-5p in hepatocellular carcinoma                                                          | 10.7150/ljms.51145                 | Article                 | 2020 | Not experimentally demonstrating a direct association between the ICI effect on changes in the levels of miRNAs or vice versa |
| Interplay between programmed death-ligand 1 and non-coding RNAs                                                                                                                                                |                                    | Review                  | 2022 | Not an original study                                                                                                         |
| Interrogating the interplay of angiogenesis and immunity in metastatic colorectal cancer                                                                                                                       | 10.5662/wjm.v12.i1.43              | Review                  | 2022 | Not an original study                                                                                                         |
| Intrahepatic Cholangiocarcinoma: Genomic Heterogeneity Between Eastern and Western Patients                                                                                                                    | 10.1200/PO.18.00414                | Article                 | 2020 | Not focused on miRNAs                                                                                                         |
| Intratumoral immunosuppression profiles in 11q-deleted neuroblastomas provide new potential therapeutic targets                                                                                                | 10.1002/1878-0261.12868            | Article                 | 2021 | Not focused on ICIs                                                                                                           |
| Ionizing Radiation-Inducible miR-27b Suppresses Leukemia Proliferation via Targeting Cyclin A2                                                                                                                 | 10.1016/j.jirobp.2014.04.055       | Article                 | 2014 | Not focused on ICIs                                                                                                           |
| Is the scavenger receptor MARCO a new immune checkpoint?                                                                                                                                                       | 10.4161/21624011.2014.955709       | Review                  | 2014 | Not an original study                                                                                                         |
| Kaposi's Sarcoma-Associated Herpesvirus MicroRNAs Target GADD45B To Protect Infected Cells from Cell Cycle Arrest and Apoptosis                                                                                | 10.1128/JVI.02045-16               | Article                 | 2017 | Not focused on ICIs                                                                                                           |
| KCNM4 may weaken anti-tumor immune response via raising Tregs and diminishing resting mast cells in clear cell renal cell carcinoma                                                                            | 10.1186/s12935-022-02626-7         | Article                 | 2022 | Not experimentally demonstrating a direct association between the ICI effect on changes in the levels of miRNAs or vice versa |
| KDM1A Promotes Immunosuppression in Hepatocellular Carcinoma by Regulating PD-L1 through Demethylating MEF2D                                                                                                   | 10.1155/2021/9995099               | Article                 | 2021 | Not experimentally demonstrating a direct association between the ICI effect on changes in the levels of miRNAs or vice versa |
| Key questions about the checkpoint blockade-are microRNAs an answer?                                                                                                                                           | 10.20892/j.san.2085-3941.2018.0006 | Review                  | 2018 | Not an original study                                                                                                         |
| Landscape of EBV-positive gastric cancer                                                                                                                                                                       | 10.1007/s10120-021-01215-3         | Review                  | 2021 | Not an original study                                                                                                         |
| Landscape of extracellular vesicles in the tumour microenvironment: Interactions with stromal cells and with non-cell components, and impacts on metabolic reprogramming, horizontal transfer of neoplastic tr | 10.1016/j.semcancer.2021.01.007    | Review                  | 2021 | Not an original study                                                                                                         |
| Large-Scale Profiling of Extracellular Vesicles Identified miR-625-5p as a Novel Biomarker of Immunotherapy Response in Advanced Non-Small-Cell Lung Cancer Patients                                           | 10.3390/cancers14102435            | Article                 | 2022 | Not experimentally demonstrating a direct association between the ICI effect on changes in the levels of miRNAs or vice versa |
| Lessons From Immune Checkpoint Inhibitor Trials in Hepatocellular Carcinoma                                                                                                                                    | 10.3389/fimmu.2021.652172          | Review                  | 2021 | Not an original study                                                                                                         |
| Leukemia cell-derived microvesicles induce T cell exhaustion via miRNA delivery                                                                                                                                | 10.1080/2162402X.2016.1448330      | Article                 | 2016 | Not experimentally demonstrating a direct association between the ICI effect on changes in the levels of miRNAs or vice versa |
| Life and Death Decision-Making by p53 and Implications for Cancer Immunotherapy                                                                                                                                | 10.1016/j.trecan.2020.10.005       | Review                  | 2022 |                                                                                                                               |



|                                                                                                                                                                                                      |                                     |                     |    |      |                                                                                                                               |
|------------------------------------------------------------------------------------------------------------------------------------------------------------------------------------------------------|-------------------------------------|---------------------|----|------|-------------------------------------------------------------------------------------------------------------------------------|
| Long non-coding RNAs XIST and MALAT1 hijack the PD-L1 regulatory signaling pathway in breast cancer subtypes                                                                                         | 10.3892/ol.2021.12854               | Article             |    | 2021 | Not experimentally demonstrating a direct association between the ICI effect on changes in the levels of miRNAs or vice versa |
| Long Noncoding RNA TUG1 Inhibits Tumor Progression through Regulating Siglec-15-Related Anti-Immune Activity in Hepatocellular Carcinoma                                                             | 10.1155/2022/9557859                | Article             |    | 2022 | Not experimentally demonstrating a direct association between the ICI effect on changes in the levels of miRNAs or vice versa |
| Longer-term follow-up of a phase 2 study (checkmate 063) of nivolumab in patients with advanced, refractory squamous non-small cell lung cancer                                                      |                                     | Conference Abstract |    | 2015 | Not an original study                                                                                                         |
| Low-dose radiation treatment enhances systemic antitumor immune responses by overcoming the inhibitory stroma                                                                                        | 10.1136/jrhc-2020-000537            | Article             |    | 2020 | Not focused neither on miRNA nor on ICIs                                                                                      |
| Lymphatic vessels, miRNAs, and CAR T cells in tumor immunology                                                                                                                                       | 10.1631/jpus.B1910003               | Review              |    | 2020 | Not an original study                                                                                                         |
| Machine learning and bioinformatics analysis revealed classification and potential treatment strategy in stage 3–4 NSCLC patients                                                                    | 10.1186/s12920-022-01184-1          | Article             |    | 2022 | Not experimentally demonstrating a direct association between the ICI effect on changes in the levels of miRNAs or vice versa |
| Machine learning-based exceptional response prediction of nivolumab monotherapy with circulating microRNAs in non-small cell lung cancer                                                             | 10.1016/j.lungcan.2022.09.004       | Article             |    | 2022 | Not experimentally demonstrating a direct association between the ICI effect on changes in the levels of miRNAs or vice versa |
| Macrophage reprogramming for anticancer therapy                                                                                                                                                      |                                     | Conference Abstract |    | 2016 | Not an original study                                                                                                         |
| Macrophage targeting in cancer                                                                                                                                                                       | 10.1111/myas.14377                  | Review              |    | 2021 | Not an original study                                                                                                         |
| Macrophages as tools and targets in cancer therapy                                                                                                                                                   | 10.1038/s41573-022-00520-5          | Review              |    | 2022 | Not an original study                                                                                                         |
| Malignant Pleural Mesothelioma: State-of-the-Art on Current Therapies and Promises for the Future                                                                                                    | 10.3389/fonc.2019.01519             | Review              |    | 2020 | Not an original study                                                                                                         |
| Manipulating immune system using nanoparticles for an effective cancer treatment: Combination of targeted therapy and checkpoint blockade miRNA                                                      | 10.1016/j.jconrel.2020.09.034       | Article             |    | 2021 | Not experimentally demonstrating a direct association between the ICI effect on changes in the levels of miRNAs or vice versa |
| Markers of Aggressiveness in Pituitary Tumors: Update and Perspectives                                                                                                                               | 10.3390/crm11216508                 | Editorial           |    | 2022 | Not an original study                                                                                                         |
| Mathematical Modelling of the Metastatic Colorectal Cancer Microenvironment Defines the Importance of Cytotoxic Lymphocyte Infiltration and Presence of PD-L1 on Antigen Presenting Cells            |                                     | Article             |    | 2020 | Not focused on miRNAs                                                                                                         |
| Mechanisms of MHC-I Downregulation and Role in Immunotherapy Response                                                                                                                                | 10.3389/fimmu.2022.844866           | Review              |    | 2022 | Not an original study                                                                                                         |
| Mechanisms of tumor-associated myeloid cells in modulating host immune microenvironment and metastatic progression                                                                                   | 10.1158/1538-7445.SABCS18-4500      | Conference Abstract |    | 2019 | Not an original study                                                                                                         |
| Melanoma genomics: a state-of-the-art review of practical clinical applications*                                                                                                                     | 10.1111/bjd.20421                   | Review              |    | 2021 | Not an original study                                                                                                         |
| Micro-RNAs, the Cornerstones of the Future of Radiobiology in Head and Neck Cancers?                                                                                                                 | 10.3390/curoncol29020069            | Review              |    | 2022 | Not an original study                                                                                                         |
| Microenvironment Remodeling and Subsequent Clinical Implications in Diffuse Large B-Cell Histologic Variant of Richter Syndrome                                                                      | 10.3389/fimmu.2020.594841           | Review              |    | 2020 | Not an original study                                                                                                         |
| Microenvironmental oxygen pressure orchestrates an anti- and pro-tumoral yδ T cell equilibrium via tumor-derived exosomes                                                                            | 10.1038/s41388-018-0627-z           | Article             |    | 2019 | Article included in qualitative synthesis                                                                                     |
| microRNA 125a Regulates MHC-I Expression on Esophageal Adenocarcinoma Cells, Associated With Suppression of Antitumor Immune Response and Poor Outcomes of Patients                                  |                                     | Article             |    | 2018 | Not experimentally demonstrating a direct association between the ICI effect on changes in the levels of miRNAs or vice versa |
| MicroRNA based theranostics for brain cancer: basic principles                                                                                                                                       | 10.1186/s13046-019-1180-5           | Review              |    | 2019 | Not an original study                                                                                                         |
| microRNA signature of T cell exhaustion                                                                                                                                                              | 10.1158/1538-7445.AM2018-5390       | Meeting Abstract    |    | 2018 | Not an original study                                                                                                         |
| MicroRNA-139 is a predictor of prostate cancer recurrence and inhibits growth and migration of prostate cancer cells through cell cycle arrest and targeting IGIFR and AXL                           | 10.1002/pros.23871                  | Article             |    | 2019 | Not focused on ICIs                                                                                                           |
| MicroRNA-140 suppresses osteosarcoma tumor growth by enhancing anti-tumor immune response and blocking mTOR signaling                                                                                |                                     | Article             |    | 2018 | Not experimentally demonstrating a direct association between the ICI effect on changes in the levels of miRNAs or vice versa |
| MicroRNA-146a regulates immune-related adverse events caused by immune checkpoint inhibitors                                                                                                         | 10.1172/ci.insight.132334           | Article             |    | 2020 | Article included in qualitative synthesis                                                                                     |
| MicroRNA-155 induction via TNF-α and IFN-γ suppresses expression of programmed death ligand-1 (PD-L1) in human primary cells                                                                         | 10.1074/jbc.M117.809053             | Article             |    | 2017 | Not experimentally demonstrating a direct association between the ICI effect on changes in the levels of miRNAs or vice versa |
| MicroRNA-199a-5p functions as a tumor suppressor in oral squamous cell carcinoma via targeting the IKK beta/NF-κappa B signaling pathway                                                             | 10.3892/jmm.2019.4083               | Article             |    | 2019 | Not focused on ICIs                                                                                                           |
| MicroRNA-200b is a potential biomarker of the expression of PD-L1 in patients with lung cancer                                                                                                       | 10.1111/1759-7714.13653             | Article             |    | 2020 | Not experimentally demonstrating a direct association between the ICI effect on changes in the levels of miRNAs or vice versa |
| MicroRNA-20b-5p overexpression combining Pembrolizumab potentiates cancer cells to radiation therapy via repressing programmed death-ligand 1                                                        | 10.1080/21655979.2021.2014617       | Article             |    | 2022 | Article included in qualitative synthesis                                                                                     |
| MicroRNA-224 negatively regulates p21 expression during late neoplastic progression in inflammatory bowel disease                                                                                    | 10.1097/MBJ.0b013431827e78eb        | Article             |    | 2013 | Not experimentally demonstrating a direct association between the ICI effect on changes in the levels of miRNAs or vice versa |
| MicroRNA-375 Inhibits Growth and Enhances Radiosensitivity in Oral Squamous Cell Carcinoma by Targeting Insulin Like Growth Factor 1 Receptor                                                        | 10.1159/000479913                   | Article             |    | 2017 | Not experimentally demonstrating a direct association between the ICI effect on changes in the levels of miRNAs or vice versa |
| MicroRNA-497-5p down-regulation increases PD-L1 expression in clear cell renal cell carcinoma                                                                                                        | 10.1080/1061186X.2018.1479755       | Article             |    | 2019 | Not experimentally demonstrating a direct association between the ICI effect on changes in the levels of miRNAs or vice versa |
| MicroRNA-S19d-3p antagonizes osteosarcoma resistance against cisplatin by targeting PD-L1                                                                                                            | 10.1002/mc.23370                    | Article             |    | 2022 | Not experimentally demonstrating a direct association between the ICI effect on changes in the levels of miRNAs or vice versa |
| MicroRNA-regulated transcriptome analysis identifies four major subtypes with prognostic and therapeutic implications in prostate cancer                                                             |                                     | Article             |    | 2021 | Not experimentally demonstrating a direct association between the ICI effect on changes in the levels of miRNAs or vice versa |
| MicroRNA-140 suppresses Helicobacter pylori-positive gastric cancer growth by enhancing the antitumor immune response                                                                                |                                     | Article             |    | 2019 | Not experimentally demonstrating a direct association between the ICI effect on changes in the levels of miRNAs or vice versa |
| MicroRNAs aid the assessment of programmed death ligand 1 expression in patients with non-small cell lung cancer                                                                                     | 10.3892/ol.2019.10207               | Article             |    | 2019 | Not experimentally demonstrating a direct association between the ICI effect on changes in the levels of miRNAs or vice versa |
| MicroRNAs are implicated in the suppression of CD4(+)CD25(-) conventional T cell proliferation by CD4(+)CD25(+) regulatory T cells                                                                   | 10.1016/j.molimm.2014.10.001        | Article             |    | 2015 | Not experimentally demonstrating a direct association between the ICI effect on changes in the levels of miRNAs or vice versa |
| MicroRNAs as Key Players in Melanoma Cell Resistance to MAPK and Immune Checkpoint Inhibitors                                                                                                        | 10.3390/jms21124544                 | Review              |    | 2020 | Not an original study                                                                                                         |
| MicroRNAs as Predictive Biomarkers of Resistance to Targeted Therapies in Gastrointestinal Tumors                                                                                                    | 10.3390/biomedicines9030318         | Review              |    | 2021 | Not an original study                                                                                                         |
| MicroRNAs at the Crossroad between Immunoeidting and Oncogenic Drivers in Hepatocellular Carcinoma                                                                                                   | 10.3390/biom12070930                | Review              |    | 2022 | Not an original study                                                                                                         |
| MicroRNAs Change the Landscape of Cancer Resistance                                                                                                                                                  |                                     | Review              |    | 2018 | Not an original study                                                                                                         |
| MicroRNAs Expression Patterns Predict Tumor Mutational Burden in Colorectal Cancer                                                                                                                   | 10.3389/fonc.2020.550986            | Article             |    | 2021 | Not experimentally demonstrating a direct association between the ICI effect on changes in the levels of miRNAs or vice versa |
| MicroRNAs in the tumor microenvironment                                                                                                                                                              | 10.1007/978-3-030-50224-9_1         | Chapter             |    | 2020 | Not an original study                                                                                                         |
| microRNAs Shape Myeloid Cell-Mediated Resistance to Cancer Immunotherapy                                                                                                                             | 10.3389/fimmu.2020.01214            | Review              |    | 2020 | Not an original study                                                                                                         |
| MicroRNAs that predict the effectiveness of anti-PD-1 therapies in patients with advanced melanoma                                                                                                   | 10.1016/j.jdemsci.2019.11.010       | Article             |    | 2020 | Not experimentally demonstrating a direct association between the ICI effect on changes in the levels of miRNAs or vice versa |
| Microsatellite Instability in Colorectal Cancers: Carcinogenesis, Neo-Antigens, Immuno-Resistance and Emerging Therapies                                                                             | 10.3390/cancers13123063             | Review              |    | 2021 | Not an original study                                                                                                         |
| miR-101, miR-548b, miR-554, and miR-1202 are reliable prognosis predictors of the miRNAs associated with cancer immunity in primary central nervous system lymphoma                                  |                                     | Article             |    | 2020 | Not experimentally demonstrating a direct association between the ICI effect on changes in the levels of miRNAs or vice versa |
| MIR-138 exerts anti-glioma efficacy by targeting immune checkpoints                                                                                                                                  | 10.1093/neuonc/nvz292               | Article             |    | 2016 | Not experimentally demonstrating a direct association between the ICI effect on changes in the levels of miRNAs or vice versa |
| MIR-146b-5p regulates IL-23 receptor complex expression in chronic lymphocytic leukemia cells                                                                                                        | 10.1182/bloodadvances.2021005726    | Article             |    | 2022 | Not experimentally demonstrating a direct association between the ICI effect on changes in the levels of miRNAs or vice versa |
| miR-148a-3p silences the CANX/MHC-I pathway and impairs CD8(+) T cell-mediated immune attack in colorectal cancer                                                                                    | 10.1096/ij.202100235R               | Article             |    | 2021 | Not experimentally demonstrating a direct association between the ICI effect on changes in the levels of miRNAs or vice versa |
| miR-149-3p reverses CD8(+) T-cell exhaustion by reducing inhibitory receptors and promoting cytokine secretion in breast cancer cells                                                                | 10.1098/rsob.190061                 | Article             |    | 2019 | Not experimentally demonstrating a direct association between the ICI effect on changes in the levels of miRNAs or vice versa |
| miR-153 suppresses IDO1 expression and enhances CAR T cell immunotherapy                                                                                                                             | 10.1186/s13045-019-0600-x           | Article             |    | 2018 | Not focused on ICIs                                                                                                           |
| miR-18a Mediates Immune Evasion in ER-Positive Breast Cancer through Wnt Signaling                                                                                                                   | 10.3390/cells11101672               | Article             |    | 2022 | Not experimentally demonstrating a direct association between the ICI effect on changes in the levels of miRNAs or vice versa |
| MIR-200b and miR-155 as predictive biomarkers for the efficacy of chemoradiation in locally advanced head and neck squamous cell carcinoma                                                           | 10.1016/j.ejca.2017.02.018          | Article             |    | 2017 | Not focused on ICIs                                                                                                           |
| MIR-200c-3p Contrasts PD-L1 Induction by Combinatorial Therapies and Slows Proliferation of Epithelial Ovarian Cancer through Downregulation of β-Catenin and c-Myc                                  | 10.3390/cells10030519               | Article             |    | 2021 | Not focused on ICIs                                                                                                           |
| miR-21 depletion in macrophages promotes tumoricidal polarization and enhances PD-1 immunotherapy                                                                                                    |                                     | Article             |    | 2018 | Article included in qualitative synthesis                                                                                     |
| MIR-29c downregulates tumor-expressed B7-H3 to mediate the antitumor NK-cell functions in ovarian cancer                                                                                             |                                     | Article             |    | 2021 | Not experimentally demonstrating a direct association between the ICI effect on changes in the levels of miRNAs or vice versa |
| Mir-34a as predictor of immunotherapy efficacy in NSCLC patients                                                                                                                                     | 10.1200/JCO.2021.39.15_suppl.e21191 | Conference Abstract |    | 2021 | Not an original study                                                                                                         |
| miR-424(322) reverses chemoresistance via T-cell immune response activation by blocking the PD-L1 immune checkpoint                                                                                  |                                     | Article             |    | 2016 | Not experimentally demonstrating a direct association between the ICI effect on changes in the levels of miRNAs or vice versa |
| miR-4759 suppresses breast cancer through immune checkpoint blockade                                                                                                                                 | 10.1016/j.csbj.2021.12.020          | Article             |    | 2021 | Article included in qualitative synthesis                                                                                     |
| miR-582 Suppresses the Proliferation of B-Cell Precursor Acute Lymphoblastic Leukemia (BCP-ALL) Cells and Protects Them From Natural Killer Cell-Mediated Cytotoxicity                               |                                     | Article             |    | 2022 | Article included in qualitative synthesis                                                                                     |
| MIR-708 promotes phagocytosis to eradicate T-ALL cells by targeting CD47                                                                                                                             |                                     | Article             |    | 2018 | Article included in qualitative synthesis                                                                                     |
| MIR155 sensitized B-lymphoma cells to anti-PD-L1 antibody via PD-1/PD-L1-mediated lymphoma cell interaction with CD8+ T cells                                                                        | 10.1186/s12943-019-0977-3           | Article             |    | 2019 | Article included in qualitative synthesis                                                                                     |
| MIR155HG is a prognostic biomarker and associated with immune infiltration and immune checkpoint molecules expression in multiple cancers                                                            | 10.1002/cam4.2583                   | Article             |    | 2019 | Not focused on miRNAs                                                                                                         |
| MIR3609 sensitizes breast cancer cells to adriamycin by blocking the programmed death-ligand 1 immune checkpoint                                                                                     | 10.1016/j.yexcr.2019.03.025         | Article             |    | 2019 | Not experimentally demonstrating a direct association between the ICI effect on changes in the levels of miRNAs or vice versa |
| MIR548P and TRAV39 Are Potential Indicators of Tumor Microenvironment and Novel Prognostic Biomarkers of Esophageal Squamous Cell Carcinoma                                                          | 10.1155/2022/3152114                | Article             |    | 2022 | Not focused on miRNAs                                                                                                         |
| miRNA as a Modulator of Immunotherapy and Immune Response in Melanoma                                                                                                                                | 10.3390/biom11111848                | Review              |    | 2021 | Not an original study                                                                                                         |
| miRNA based tumor mutation burden diagnostic and prognostic prediction models for endometrial cancer                                                                                                 | 10.1080/21655979.2021.1947940       | Article             |    | 2021 | Not experimentally demonstrating a direct association between the ICI effect on changes in the levels of miRNAs or vice versa |
| MIRNA expression patterns are associated with tumor mutational burden in lung adenocarcinoma                                                                                                         | 10.1080/2162402X.2019.1629260       | Article             |    | 2019 | Not experimentally demonstrating a direct association between the ICI effect on changes in the levels of miRNAs or vice versa |
| MIRNA set dysregulation in breast cancer cells can contribute to both primary and acquired resistance to immune checkpoint blockade                                                                  | 10.1016/j.ejca.2018.01.033          | Meeting Abstract    |    | 2018 | Not an original study                                                                                                         |
| miRNA- and cytokine-associated extracellular vesicles mediate squamous cell carcinomas                                                                                                               | 10.1080/20013078.2020.1790159       | Article             |    | 2020 | Not experimentally demonstrating a direct association between the ICI effect on changes in the levels of miRNAs or vice versa |
| miRNA-506-3p Directly Regulates rs10754339 (A/G) in the Immune Checkpoint Protein B7-H4 in Breast Cancer                                                                                             | 10.2174/221153660966201209152949    | Article             |    | 2020 | Full text unavailable                                                                                                         |
| miRNA-5119 regulates immune checkpoint in dendritic cells to enhance breast cancer immunotherapy                                                                                                     |                                     | Article             |    | 2020 | Not experimentally demonstrating a direct association between the ICI effect on changes in the levels of miRNAs or vice versa |
| miRNA-Based Feature Classifier Is Associated with Tumor Mutational Burden in Head and Neck Squamous Cell Carcinoma                                                                                   | 10.1155/2020/1688480                | Article             |    | 2020 | Not experimentally demonstrating a direct association between the ICI effect on changes in the levels of miRNAs or vice versa |
| miRNA-based model for predicting the TMB level in colon adenocarcinoma based on a LASSO logistic regression method                                                                                   | 10.1097/MD.00000000000026088        | Article             |    | 2021 | Not experimentally demonstrating a direct association between the ICI effect on changes in the levels of miRNAs or vice versa |
| miRNA-Based Signature Associated With Tumor Mutational Burden in Colon Adenocarcinoma                                                                                                                | 10.3389/fonc.2021.634841            | Article             |    | 2021 | Not experimentally demonstrating a direct association between the ICI effect on changes in the levels of miRNAs or vice versa |
| miRNA-Based Therapeutics in the Era of Immune-Checkpoint Inhibitors                                                                                                                                  | 10.3390/ph14020089                  | Review              |    | 2021 | Not an original study                                                                                                         |
| miRNA-target Regulatory Network showing interaction between Genes of Immune Checkpoints and Cancer Pathways                                                                                          |                                     | Review              |    | 2020 | Not an original study                                                                                                         |
| miRNAs and lncRNAs as Novel Therapeutic Targets to Improve Cancer Immunotherapy                                                                                                                      | 10.3390/cancers13071587             | Review              |    | 2021 | Not an original study                                                                                                         |
| miRNAs as Key Players in the Management of Cutaneous Melanoma                                                                                                                                        | 10.3390/cells9020415                | Review              |    | 2020 | Not an original study                                                                                                         |
| miRNAs in lung cancer. A systematic review identifies predictive and prognostic miRNA candidates for precision medicine in lung cancer                                                               | 10.1016/j.lrsj.2020.11.012          | Review              |    | 2021 | Not an original study                                                                                                         |
| miRNAs in Regulation of Tumor Microenvironment, Chemotherapy Resistance, Immunotherapy Modulation and miRNA Therapeutics in Cancer                                                                   |                                     | Review              |    | 2022 | Not an original study                                                                                                         |
| Modulating the tumor immune microenvironment with nanoparticles: A sword for improving the efficiency of ovarian cancer immunotherapy                                                                | 10.3389/fimmu.2022.1057850          | Review              |    | 2022 | Not an original study                                                                                                         |
| Modulation of immunosuppressive cells and noncoding RNAs as immunotherapy in osteosarcoma                                                                                                            | 10.3389/fimmu.2022.1025532          | Short Survey        |    | 2022 | Not an original study                                                                                                         |
| Molecular and immune targets for Merkel cell carcinoma therapy and prevention                                                                                                                        | 10.1002/mc.23042                    | Review              |    | 2019 | Not an original study                                                                                                         |
| Molecular characterization, clinical relevance and immune feature of m7G regulator genes across 33 cancer types                                                                                      | 10.3389/fgene.2022.981567           | Article             |    | 2022 | Not focused on miRNAs                                                                                                         |
| Molecular events in the pathogenesis of vulvar squamous cell carcinoma                                                                                                                               | 10.1053/j.semdp.2020.09.010         | Review              |    | 2021 | Not an original study                                                                                                         |
| Molecular landscape of IDH-mutant astrocytoma and oligodendroglioma grade 2 indicate tumor purity as an underlying genomic factor                                                                    | 10.1186/s10020-022-00454-z          | Article             |    | 2022 | Not focused on ICIs                                                                                                           |
| Molecular mechanism for miR-350 in regulating of titanium dioxide nanoparticles in macrophage RAW264.7 cells                                                                                         | 10.1016/j.cbi.2017.12.020           | Article             |    | 2018 | Not focused on ICIs                                                                                                           |
| Molecular Mechanisms of Cutaneous Squamous Cell Carcinoma                                                                                                                                            | 10.3390/jms23073478                 | Review              |    | 2022 | Not an original study                                                                                                         |
| Molecular mechanisms of pd-1 and pd-1 activity on a pan-cancer basis: A bioinformatic exploratory study                                                                                              | 10.3390/jms22115478                 | Article             |    | 2021 | Not experimentally demonstrating a direct association between the ICI effect on changes in the levels of miRNAs or vice versa |
| Molecular Mechanisms of Resistance to Immunotherapy and Antiangiogenic Treatments in Clear Cell Renal Cell Carcinoma                                                                                 | 10.3390/cancers13235981             | Review              |    | 2021 | Not an original study                                                                                                         |
| Molecular pathology of thymomas: Implications for diagnosis and therapy                                                                                                                              | 10.1007/s00428-021-03068-8          | Review              |    | 2021 | Not an original study                                                                                                         |
| Molecular Pathology of Well-Differentiated Gastro-entero-pancreatic Neuroendocrine Tumors                                                                                                            | 10.1007/s12022-021-09662-5          | Review              |    | 2021 | Not an original study                                                                                                         |
| Molecular Signatures in Hepatocellular Carcinoma: A Step Toward Rationally Designed Cancer Therapy                                                                                                   | 10.1002/ncr.31257                   | Review              |    | 2018 | Not an original study                                                                                                         |
| Msi1 in maintaining breast cancer stem cell involves the AKT/PISK pathway                                                                                                                            | 10.1158/1538-7445.SABCS15-P1-06-07  | Conference Abstract |    | 2016 | Not an original study                                                                                                         |
| Multi-layered control of PD-L1 expression in Epstein-Barr virus-associated gastric cancer                                                                                                            |                                     | Review              |    | 2020 | Not an original study                                                                                                         |
| Multi-modal molecular programs regulate melanoma cell state                                                                                                                                          | 10.1038/s41467-022-31510-1          | Article             |    | 2022 | Not focused on miRNAs                                                                                                         |
| Multicomponent siRNA/miRNA-loaded modified mesoporous silica nanoparticles targeted bladder cancer for a highly effective combination therapy                                                        |                                     | Article             |    | 2022 | Not experimentally demonstrating a direct association between the ICI effect on changes in the levels of miRNAs or vice versa |
| Multidimensional Analysis of the Prognostic Value, Immune Regulatory Function, and ceRNA Network of LY6E in Individuals with Colorectal Cancer                                                       | 10.1155/2022/5164265                | Article             |    | 2022 | Not experimentally demonstrating a direct association between the ICI effect on changes in the levels of miRNAs or vice versa |
| Multiple endocrine neoplasia type 1 (MEN-1) and neuroendocrine neoplasms (NENs)                                                                                                                      | 10.1016/j.semcancer.2021.04.011     | Review              |    | 2022 | Not an original study                                                                                                         |
| Multiple strategies to improve the therapeutic efficacy of oncolytic herpes simplex virus in the treatment of glioblastoma (Review)                                                                  | 10.3892/ol.2021.12771               | Article             |    | 2021 | Not focused on miRNAs                                                                                                         |
| Myeloid-derived suppressor cells-new and exciting players in lung cancer                                                                                                                             | 10.1186/s13045-020-0843-1           | Review              |    | 2020 | Not an original study                                                                                                         |
| N6-methyladenosine-associated prognostic pseudogenes contribute to predicting immunotherapy benefits and therapeutic agents in head and neck squamous cell carcinoma                                 | 10.7150/hno.76689                   | Article             |    | 2022 | Not experimentally demonstrating a direct association between the ICI effect on changes in the levels of miRNAs or vice versa |
| Nano-constructs targeting the primary cellular energy source of cancer cells for modulating tumor progression                                                                                        | 10.1016/j.onano.2022.100107         | Article             |    | 2022 | Not focused on the miRNA/ICI relationship                                                                                     |
| Nanobubble-mediated co-delivery of Ccl8 and miR-195 for synergized sonodynamic and checkpoint blockade combination therapy with elicitation of robust immune response in hepatocellular carcinoma    | 10.1016/j.ejpb.2022.10.017          | Article             |    | 2022 | Not experimentally demonstrating a direct association between the ICI effect on changes in the levels of miRNAs or vice versa |
| Nanobubbles containing PD-L1 Ab and miR-424 mediated PD-L1 blockade, and its expression inhibition to enable and potentiate hepatocellular carcinoma immunotherapy in mice                           | 10.1016/j.ipharm.2022.122352        | Article             |    | 2022 | Article included in qualitative synthesis                                                                                     |
| Nanoparticles for Chemoinmunotherapy Against Triple-Negative Breast Cancer                                                                                                                           | 10.2147/J.N.S388075                 | Review              |    | 2022 | Not an original study                                                                                                         |
| Natural Killer Cells as Key Mediators in Type 1 Diabetes Immunopathology                                                                                                                             | 10.3389/fimmu.2021.722979           | Review              |    | 2021 | Not an original study                                                                                                         |
| Neuroimmune crosstalk and its impact on cancer therapy and research                                                                                                                                  | 10.1007/s12672-022-00547-5          | Review              |    | 2022 | Not an original study                                                                                                         |
| Neutrophil: A New Player in Metastatic Cancers                                                                                                                                                       | 10.3389/fimmu.2020.565165           | Review              |    | 2020 | Not an original study                                                                                                         |
| Next Steps for Immunotherapy in Glioblastoma                                                                                                                                                         | 10.3390/cancers14164023             | Review              |    | 2022 | Not an original study                                                                                                         |
| Nivolumab alone or in combination with cisplatin plus gemcitabine in Japanese patients with unresectable or recurrent biliary tract cancer: a non-randomised, multicentre, open-label, phase 1 study | 10.1016/S2468-1253(19)30086-X       | Article             |    | 2019 | Not focused on miRNAs                                                                                                         |
| Non-Coding RNA in Penile Cancer                                                                                                                                                                      | 10.3389/fonc.2022.812008            | Review              |    | 2022 | Not an original study                                                                                                         |
| Non-coding RNAs: Key players in T cell exhaustion                                                                                                                                                    | 10.3389/fimmu.2022.959729           | Review              |    | 2022 | Not an original study                                                                                                         |
| Noncoding RNAs as potential mediators of resistance to cancer immunotherapy                                                                                                                          | 10.1016/j.semcancer.2019.11.006     | Review              |    | 2020 | Not an original study                                                                                                         |
| Nonsense-mutation in TP53 improves clinical benefits of PD-1/PD-L1 blockade immunotherapy in advanced urothelial carcinoma through up-regulating PD-L1 expression via miR-34a                        | 10.1016/S0302-2838(21)00833-2       | Conference Abstract |    | 2021 | Not an original study                                                                                                         |
| Novel biomarkers of gastrointestinal cancer                                                                                                                                                          | 10.3390/cancers13071501             | Editorial           |    | 2021 | Not an original study                                                                                                         |
| Novel Implications of MicroRNAs, Long Non-coding RNAs and Circular RNAs in Drug Resistance of Esophageal Cancer                                                                                      | 10.3389/fcell.2021.764313           | Review              |    | 2021 | Not an original study                                                                                                         |
| Novel insights into the biomarkers and therapies for primary central nervous system lymphoma                                                                                                         | 10.1177/17588359221093745           | Review              |    | 2022 | Not an original study                                                                                                         |
| Novel macrophage-related gene prognostic index for glioblastoma associated with M2 macrophages and T cell dysfunction                                                                                | 10.3389/fimmu.2022.941556           | Article             |    | 2022 | Not experimentally demonstrating a direct association between the ICI effect on changes in the levels of miRNAs or vice versa |
| Novel miRNAs as Potential Regulators of PD-1/PD-L1 Immune Checkpoint, and Prognostic Value of MIR9-1 and MIR124-2 Methylation in Ovarian Cancer                                                      | 10.1134/S0026893320060072           | Article             |    | 2020 | Not experimentally demonstrating a direct association between the ICI effect on changes in the levels of miRNAs or vice versa |
| Novel possibility for cutaneous melanoma treatment by means of rosmarinic acid action on purinergic signaling                                                                                        | 10.1007/s11302-021-09821-7          | Review              |    | 2022 | Not an original study                                                                                                         |
| OncoAlert Round Table Discussions: The Global COVID-19 Experience                                                                                                                                    | 10.1200/GO.20.09603                 | Review              |    | 2021 | Not an original study                                                                                                         |
| Oncolytic adenovirus: A tool for reversing the tumor microenvironment and promoting cancer treatment (Review)                                                                                        | 10.3892/OR.2021.8000                | Review              |    | 2021 | Not an original study                                                                                                         |
| ONCR-177, an Oncolytic HSV-1 Designed to Potently Activate Systemic Antitumor Immunity                                                                                                               | 10.1158/2326-6066.CCR-20-0609       | Article             |    | 2021 | Not experimentally demonstrating a direct association between the ICI effect on changes in the levels of miRNAs or vice versa |
| One year in review 2020: Comorbidities, diagnosis and treatment of primary Sjögren's syndrome                                                                                                        |                                     | Review              |    | 2021 | Not an original study                                                                                                         |
| Organic/Inorganic Self-Assembled Hybrid Nano-Architectures for Cancer Therapy Applications                                                                                                           | 10.1002/mabi.2021100349             | Review              |    | 2022 | Not an original study                                                                                                         |
| Over-Expression of GUSB Leads to Primary Resistance of Anti-PD1 Therapy in Hepatocellular Carcinoma                                                                                                  | 10.3389/fimmu.2022.876048           | Article             |    | 2022 | Not experimentally demonstrating a direct association between the ICI effect on changes in the levels of miRNAs or vice versa |
| Overcoming anti-cancer drug resistance via restoration of tumor suppressor gene function                                                                                                             | 10.1016/j.drug.2021.100770          | Review              |    | 2021 | Not an original study                                                                                                         |
| Overcoming resistance to PD-1/PD-L1 inhibitors in esophageal cancer                                                                                                                                  | 10.3389/fonc.2022.955163            | Review              |    | 2022 | Not an original study                                                                                                         |
| PI,15-02 Plasma microRNAs Modulation in Advanced NSCLC Patients Receiving Single Agent Immune Checkpoint Inhibitors                                                                                  | 10.1016/j.jtho.2022.07.198          | Conference Abstract |    | 2022 | Not an original study                                                                                                         |
| PB2.02 Stereotactic Ablative Radiotherapy with Nivolumab for Early-Stage Operable Non-Small Cell Lung Cancer: a phase 2 study                                                                        | 10.1016/j.jtho.2021.01.1193         | Conference Abstract | </ |      |                                                                                                                               |



|                                                                                                                                                                                                            |                                   |                     |      |                                                                                                                               |
|------------------------------------------------------------------------------------------------------------------------------------------------------------------------------------------------------------|-----------------------------------|---------------------|------|-------------------------------------------------------------------------------------------------------------------------------|
| Potentiating therapeutic effects of epidermal growth factor receptor inhibition in triple-negative breast cancer                                                                                           | 10.3390/ph14060589                | Review              | 2021 | Not an original study                                                                                                         |
| Predictive biomarkers for systemic therapy of hepatocellular carcinoma                                                                                                                                     | 10.1080/14737159.2021.1987217     | Review              | 2021 | Not an original study                                                                                                         |
| Predictive role of plasmatic biomarkers in advanced non-small cell lung cancer treated by nivolumab                                                                                                        | 10.1080/2162402X.2018.1452561     | Article             | 2018 | Not experimentally demonstrating a direct association between the ICI effect on changes in the levels of miRNAs or vice versa |
| Profilin 1 protein and its implications for cancers                                                                                                                                                        | 10.46883/ONC.2021.3507.0402       | Review              | 2021 | Not an original study                                                                                                         |
| Prognostic and predictive biomarkers in gliomas                                                                                                                                                            | 10.3390/ljms221910373             | Review              | 2021 | Not an original study                                                                                                         |
| Prognostic and predictive biomarkers in stage III melanoma: Current insights and clinical implications                                                                                                     | 10.3390/ljms22094561              | Review              | 2021 | Not an original study                                                                                                         |
| Prognostic Characteristics of Immune-Related Genes and the Related Regulatory Axis in Patients With Stage N+M0 Breast Cancer                                                                               | 10.3389/fonc.2022.878219          | Article             | 2022 | Not experimentally demonstrating a direct association between the ICI effect on changes in the levels of miRNAs or vice versa |
| Prognostic Ferroptosis-Related lncRNA Signatures Associated With Immunotherapy and Chemotherapy Responses in Patients With Stomach Cancer                                                                  | 10.3389/fgene.2021.798612         | Article             | 2021 | Not experimentally demonstrating a direct association between the ICI effect on changes in the levels of miRNAs or vice versa |
| Prophylactic In Vivo Hematopoietic Stem Cell Gene Therapy with an Immune Checkpoint Inhibitor Reverses Tumor Growth in Syngeneic Mouse Tumor Models                                                        | 10.1158/0008-5472.CAN-19-1044     | Article             | 2020 | Not experimentally demonstrating a direct association between the ICI effect on changes in the levels of miRNAs or vice versa |
| Prostaglandin E2 Receptor 4 (EP4) as a Therapeutic Target to Impede Breast Cancer-Associated Angiogenesis and Lymphangiogenesis                                                                            | 10.3390/cancers13050942           | Review              | 2021 | Not an original study                                                                                                         |
| Proteogenomic characterization of human colon cancer reveals new therapeutic opportunities                                                                                                                 | 10.1158/1538-7445.AM2019-LB-006   | Meeting Abstract    | 2019 | Not an original study                                                                                                         |
| Quadruple negative breast cancer                                                                                                                                                                           | 10.1007/s12282-020-01047-6        | Review              | 2020 | Not an original study                                                                                                         |
| Quantifying the contribution of transcription factor activity, mutations and microRNAs to CD274 expression in cancer patients                                                                              | 10.1038/s41598-022-06356-0        | Article             | 2022 | Not experimentally demonstrating a direct association between the ICI effect on changes in the levels of miRNAs or vice versa |
| Racial disparity in prostate cancer in the African American population with actionable ideas and novel immunotherapies                                                                                     | 10.1002/cnr2.1340                 | Review              | 2021 | Not an original study                                                                                                         |
| Recent Advances in Glioma Cancer Treatment: Conventional and Epigenetic Realms                                                                                                                             | 10.3390/vaccines10091448          | Review              | 2022 | Not an original study                                                                                                         |
| Recent advances in pancreatic cancer: Novel prognostic biomarkers and targeted therapy—a review of the literature                                                                                          | 10.3390/biom11101469              | Review              | 2021 | Not an original study                                                                                                         |
| Recent advances in the role of Th17/Treg cells in tumor immunity and tumor therapy                                                                                                                         | 10.1007/s12026-021-09211-6        | Review              | 2021 | Not an original study                                                                                                         |
| Recurrent myocarditis induced by immune-checkpoint inhibitor treatment is accompanied by persistent inflammatory markers despite immunosuppressive treatment                                               | 10.1200/P0.20.00370               | Article             | 2021 | Not focused on miRNAs                                                                                                         |
| Refining immunotherapeutic approaches to high-risk neuroblastoma based on tumor genomic profiles                                                                                                           | 10.1002/1878-0261.12880           | Note                | 2021 | Not an original study                                                                                                         |
| Regulation and function of autophagy in pancreatic cancer                                                                                                                                                  | 10.1080/15548627.2020.1847462     | Review              | 2021 | Not an original study                                                                                                         |
| Regulation of CD47 expression in cancer cells                                                                                                                                                              |                                   | Review              | 2020 | Not an original study                                                                                                         |
| Regulation of PD-1/PD-L1 Pathway in Cancer by Noncoding RNAs                                                                                                                                               |                                   | Review              | 2020 | Not an original study                                                                                                         |
| Regulatory T cells and their associated factors in hepatocellular carcinoma development and therapy                                                                                                        | 10.3748/wjg.v28.i27.3346          | Review              | 2022 | Not an original study                                                                                                         |
| Relationship Between CNVs and Immune Cells Infiltration in Gastric Tumor Microenvironment                                                                                                                  | 10.3389/fgene.2022.869967         | Article             | 2022 | Not focused on miRNAs                                                                                                         |
| Resistance of Lenvatinib in Hepatocellular Carcinoma                                                                                                                                                       | 10.2174/156800962266620428111327  | Review              | 2022 | Not an original study                                                                                                         |
| Restoration of miR-340 controls pancreatic cancer cell CD47 expression to promote macrophage phagocytosis and enhance antitumor immunity                                                                   |                                   | Article             | 2020 | Article included in qualitative synthesis                                                                                     |
| Resveratrol as an enhancer of apoptosis in cancer: A mechanistic review                                                                                                                                    | 10.2174/1871520620666201020160348 | Review              | 2021 | Not an original study                                                                                                         |
| Reversal of resistance to anti-cd20 antibody therapies: Targeting intracellular resistant factors                                                                                                          | 10.1615/CritRevOncog.2020036109   | Review              | 2020 | Not an original study                                                                                                         |
| Review article: systemic treatment of hepatocellular carcinoma                                                                                                                                             | 10.1111/apt.14913                 | Review              | 2018 | Not an original study                                                                                                         |
| Risk Factors and Biomarkers for Immune-Related Adverse Events: A Practical Guide to Identifying High-Risk Patients and Rechallenging Immune Checkpoint Inhibitors                                          | 10.3389/fimmu.2022.779691         | Review              | 2022 | Not an original study                                                                                                         |
| Risk of reactivation of occult hepatitis B during immunotherapy in cancer treatment: Myth, reality or new horizons?                                                                                        | 10.2217/fon-2020-1196             | Note                | 2021 | Not an original study                                                                                                         |
| RNA N6-methyladenosine: a new player in autophagy-mediated anti-cancer drug resistance                                                                                                                     | 10.1038/s41416-021-01314-z        | Note                | 2021 | Not an original study                                                                                                         |
| Role of Abdominal and Pelvic CT Scans in Diagnosis of Patients with Immunotherapy-Induced Colitis                                                                                                          | 10.36401/JIPO-21-21               | Article             | 2022 | Not focused on miRNAs                                                                                                         |
| Role of Epigenetic Regulation in Plasticity of Tumor Immune Microenvironment                                                                                                                               | 10.3389/fimmu.2021.640389         | Review              | 2021 | Not an original study                                                                                                         |
| Role of Exosomes in Immunotherapy of Hepatocellular Carcinoma                                                                                                                                              | 10.3390/cancers14164036           | Review              | 2022 | Not an original study                                                                                                         |
| Role of miRNAs in immune responses and immunotherapy in cancer                                                                                                                                             | 10.1002/gcc.22725                 | Review              | 2019 | Not an original study                                                                                                         |
| Role of tumor microenvironment in the regulation of PD-L1: A novel role in resistance to cancer immunotherapy                                                                                              |                                   | Review              | 2020 | Not an original study                                                                                                         |
| Roles of Cadherin2 in Thyroid Cancer                                                                                                                                                                       | 10.3389/fonc.2022.804287          | Article             | 2022 | Not experimentally demonstrating a direct association between the ICI effect on changes in the levels of miRNAs or vice versa |
| Rx10754339 (A/G) in 3'UTR of BT-H4 regulated by miR-506-3p prevents breast cancer progression                                                                                                              |                                   | Conference Abstract | 2018 | Not an original study                                                                                                         |
| Safety and activity of microRNA-loaded minicells in patients with recurrent malignant pleural mesothelioma: a first-in-man, phase 1, open-label, dose-escalation study                                     | 10.1016/S1470-2045(17)00621-6     | Article             | 2017 | Not experimentally demonstrating a direct association between the ICI effect on changes in the levels of miRNAs or vice versa |
| Serum exosomal miR-16-5p functions as a tumor inhibitor and a new biomarker for PD-L1 inhibitor-dependent immunotherapy in lung adenocarcinoma by regulating PD-L1 expression                              | 10.1002/cam4.4638                 | Article             | 2022 | Article included in qualitative synthesis                                                                                     |
| SETD2-mediated loss of miR-339 promotes tumor PD-L1 expression and attenuates antitumor immunity in renal cell carcinoma                                                                                   |                                   | Conference Abstract | 2019 | Not an original study                                                                                                         |
| Shifting gears in precision oncology—challenges and opportunities of integrative data analysis                                                                                                             | 10.3390/biom11091310              | Review              | 2021 | Not an original study                                                                                                         |
| Shooting at moving and hidden targets—tumour cell plasticity and the notch signalling pathway in head and neck squamous cell carcinomas                                                                    | 10.3390/cancers13246219           | Review              | 2021 | Not an original study                                                                                                         |
| Signal Pathway of Estrogen and Estrogen Receptor in the Development of Thyroid Cancer                                                                                                                      | 10.3390/fonc.2021.593479          | Review              | 2021 | Not an original study                                                                                                         |
| Silencing EGFR-upregulated expression of CD55 and CD59 activates the complement system and sensitizes lung cancer to checkpoint blockade                                                                   | 10.1038/s43018-022-00444-4        | Article             | 2022 | Not experimentally demonstrating a direct association between the ICI effect on changes in the levels of miRNAs or vice versa |
| Single-cell analysis of a tumor-derived exosome signature correlates with prognosis and immunotherapy response                                                                                             |                                   | Article             | 2021 | Not focused on miRNAs                                                                                                         |
| Small Extracellular Vesicles: A Novel Avenue for Cancer Management                                                                                                                                         | 10.3389/fonc.2021.638357          | Review              | 2021 | Not an original study                                                                                                         |
| Soft tissue sarcoma: An insight on biomarkers at molecular, metabolic and cellular level                                                                                                                   | 10.3390/cancers13123044           | Review              | 2021 | Not an original study                                                                                                         |
| Soluble Biomarkers with Prognostic and Predictive Value in Advanced Non-Small Cell Lung Cancer Treated with Immunotherapy                                                                                  | 10.3390/cancers13174280           | Review              | 2021 | Not an original study                                                                                                         |
| Soluble PD-1: Predictive, Prognostic, and Therapeutic Value for Cancer Immunotherapy                                                                                                                       | 10.3389/fimmu.2020.587460         | Review              | 2020 | Not an original study                                                                                                         |
| Sos2 comes to the fore: Differential functionalities in physiology and pathology                                                                                                                           | 10.3390/ljms22126613              | Review              | 2021 | Not an original study                                                                                                         |
| Sotorasib for previously treated colorectal cancers with KRAS(G12C) mutation (CodeBreak100): a prespecified analysis of a single-arm, phase 2 trial                                                        | 10.1016/S1470-2045(21)00605-7     | Article             | 2022 | Not focused neither on mRNA nor on ICIs                                                                                       |
| Spatial and phenotypic immune profiling of metastatic colon cancer                                                                                                                                         |                                   | Article             | 2018 | Not focused on miRNAs                                                                                                         |
| Special issue: Resistance mechanisms to cancer immunotherapy                                                                                                                                               | 10.1016/j.semcancer.2020.01.014   | Editorial           | 2020 | Not an original study                                                                                                         |
| Spectrum of Immune Checkpoint Inhibitor Anemias: Results From a Single Center, Early-Phase Clinical Trials Case Series Experience                                                                          | 10.14740/jh1006                   | Article             | 2022 | Not focused on miRNAs                                                                                                         |
| Stem cells as therapeutic targets in colorectal cancer                                                                                                                                                     | 10.2217/pme-2020-0099             | Review              | 2021 | Not an original study                                                                                                         |
| Suppression of microRNA activity amplifies IFN-γ-induced macrophage activation and promotes anti-tumour immunity                                                                                           |                                   | Article             | 2016 | Not experimentally demonstrating a direct association between the ICI effect on changes in the levels of miRNAs or vice versa |
| Surface Heparinization of a Magnesium-Based Alloy: A Comparison Study of Aminopropyltriethoxysilane (APTES) and Polyamidoamine (PAMAM) Dendrimers                                                          | 10.3390/fb13040296                | Article             | 2022 | Not focused neither on mRNA nor on ICIs                                                                                       |
| Systematic analysis of berberine-induced signaling pathway between miRNA clusters and mRNAs and identification of mir-99a similar to 125b cluster function by seed-targeted inhibitors in multiple myeloma | 10.1080/15476286.2015.1017219     | Systematic revision | 2015 | Not an original study                                                                                                         |
| Systemic Therapy and Sequencing Options in Advanced Hepatocellular Carcinoma: A Systematic Review and Network Meta-analysis                                                                                | 10.1001/jamaoncol.2020.4930       | Systematic revision | 2020 | Not an original study                                                                                                         |
| Targeted drug delivery system for ovarian cancer microenvironment: Improving the effects of immunotherapy                                                                                                  | 10.3389/fimmu.2022.1035997        | Review              | 2022 | Not an original study                                                                                                         |
| Targeted nano-drug delivery of colchicine against colon cancer cells by means of mesoporous silica nanoparticles                                                                                           | 10.3390/cancers12010144           | Article             | 2020 | Not experimentally demonstrating a direct association between the ICI effect on changes in the levels of miRNAs or vice versa |
| Targeted therapy and personalized medicine in hepatocellular carcinoma: drug resistance, mechanisms, and treatment strategies                                                                              | 10.2147/JHC.S106529               | Review              | 2017 | Not an original study                                                                                                         |
| Targeted treatment of head and neck (Pre) cancer: Preclinical target identification and development of novel therapeutic applications                                                                      | 10.3390/cancers13112774           | Review              | 2021 | Not an original study                                                                                                         |
| Targeting Cancer Stem Cells through Epigenetic Modulation of Interferon Response                                                                                                                           | 10.3390/jpm12040556               | Review              | 2022 | Not an original study                                                                                                         |
| Targeting KRAS: Crossroads of Signalling and Immune Inhibition                                                                                                                                             | 10.36401/JIPO-22-5                | Review              | 2022 | Not an original study                                                                                                         |
| Targeting Myeloid-Derived Suppressor Cells to Enhance the Antitumor Efficacy of Immune Checkpoint Blockade Therapy                                                                                         | 10.3389/fimmu.2021.754196         | Review              | 2021 | Not an original study                                                                                                         |
| Targeting non-coding RNAs to overcome cancer therapy resistance                                                                                                                                            | 10.1038/s41392-022-00975-3        | Review              | 2022 | Not an original study                                                                                                         |
| Targeting nuclear acid-mediated immunity in cancer immune checkpoint inhibitor therapies                                                                                                                   | 10.1038/s41392-020-00347-9        | Review              | 2020 | Not an original study                                                                                                         |
| Targeting PD-1/PD-L1 axis as new horizon for ovarian cancer therapy                                                                                                                                        | 10.1016/j.lfs.2022.120827         | Review              | 2022 | Not an original study                                                                                                         |
| Targeting T Cell Subtypes for NAFLD and NAFLD-Related HCC Treatment: An Opinion                                                                                                                            | 10.3389/fmed.2021.789659          | Review              | 2021 | Not an original study                                                                                                         |
| Targeting tumor-associated macrophages to synergize tumor immunotherapy                                                                                                                                    | 10.1038/s41392-021-00484-9        | Review              | 2021 | Not an original study                                                                                                         |
| Tertiary lymphoid structure signatures are associated with survival and immunotherapy response in muscle-invasive bladder cancer                                                                           | 10.1080/2162402X.2021.1915574     | Article             | 2021 | Not experimentally demonstrating a direct association between the ICI effect on changes in the levels of miRNAs or vice versa |
| Thalidomide suppresses angiogenesis and immune evasion via lncRNA FGD5-AS1/miR-454-3p/ZEB1 axis-mediated VEGFA expression and PD-1/PD-L1 checkpoint in NSCLC                                               | 10.1016/j.cbi.2021.109652         | Article             | 2021 | Not experimentally demonstrating a direct association between the ICI effect on changes in the levels of miRNAs or vice versa |
| The 150 most important questions in cancer research and clinical oncology series: questions 57-66 : Edited by Chinese Journal of Cancer                                                                    | 10.1186/s40880-017-0249-9         | Review              | 2017 | Not an original study                                                                                                         |
| The biological complexity of urothelial carcinoma: Insights into carcinogenesis, targets and biomarkers of response to therapeutic approaches                                                              | 10.1016/j.semcancer.2015.08.006   | Review              | 2015 | Not an original study                                                                                                         |
| The CDK1-Related lncRNA and CXCL8 Mediated Immune Resistance in Lung Adenocarcinoma                                                                                                                        | 10.3390/cells11172688             | Article             | 2022 | Not experimentally demonstrating a direct association between the ICI effect on changes in the levels of miRNAs or vice versa |
| The Chemokine System in Oncogenic Pathways Driven by Viruses: Perspectives for Cancer Immunotherapy                                                                                                        | 10.3390/cancers14030848           | Review              | 2022 | Not an original study                                                                                                         |
| The circular RNA circDLG1 promotes gastric cancer progression and anti-PD-1 resistance through the regulation of CXCL12 by sponging miR-141-3p                                                             | 10.1186/s12943-021-01475-8        | Article             | 2021 | Not experimentally demonstrating a direct association between the ICI effect on changes in the levels of miRNAs or vice versa |
| The clinical outcome and risk factors analysis of immune checkpoint inhibitor-based treatment in lung adenocarcinoma patients with brain metastases                                                        | 10.21037/tlcr-22-260              | Article             | 2022 | Not experimentally demonstrating a direct association between the ICI effect on changes in the levels of miRNAs or vice versa |
| The Combination of Radiotherapy With Immunotherapy and Potential Predictive Biomarkers for Treatment of Non-Small Cell Lung Cancer Patients                                                                | 10.3389/fimmu.2021.723609         | Review              | 2021 | Not an original study                                                                                                         |
| The crosstalk between tumor cells and the microenvironment in hepatocellular carcinoma: The role of exosomal micrornas and their clinical implications                                                     | 10.3390/cancers12040823           | Review              | 2020 | Not an original study                                                                                                         |
| The crucial roles of long noncoding RNA SNHG8 in lung cancer                                                                                                                                               | 10.1007/s12094-022-02909-5        | Review              | 2022 | Not an original study                                                                                                         |
| The emerging role of miRNA in the perturbation of tumor immune microenvironment in chemoresistance: Therapeutic implications                                                                               | 10.1016/j.semcdb.2021.04.001      | Review              | 2022 | Not an original study                                                                                                         |
| The Emerging Role of T-Cell Immunoglobulin Mucin-3 in Breast Cancer: A Promising Target For Immunotherapy                                                                                                  | 10.3389/fonc.2021.723238          | Review              | 2021 | Not an original study                                                                                                         |
| The enigma of Kaposi sarcoma management                                                                                                                                                                    | 10.1136/jm-2021-MW.52             | Conference Abstract | 2021 | Not an original study                                                                                                         |
| The expression pattern of Immune checkpoints after chemo/radiotherapy in the tumor microenvironment                                                                                                        | 10.3389/fimmu.2022.938063         | Review              | 2022 | Not an original study                                                                                                         |
| The Extrinsic and Intrinsic Roles of PD-L1 and Its Receptor PD-1: Implications for Immunotherapy Treatment                                                                                                 | 10.3389/fimmu.2020.568931         | Review              | 2020 | Not an original study                                                                                                         |
| The generation of PD-L1 and PD-L2 in cancer cells: From nuclear chromatin reorganization to extracellular presentation                                                                                     |                                   | Review              | 2022 | Not an original study                                                                                                         |
| The immuno-therapeutic potential of miR-2392 in patients with hepatocellular carcinoma                                                                                                                     | 10.1111/liv.15395                 | Letter              | 2022 | Not an original study                                                                                                         |
| The importance of establishing genetic phase in clinical medicine                                                                                                                                          | 10.1111/j.12567                   | Review              | 2022 | Not an original study                                                                                                         |
| The importance of immune checkpoints in immune monitoring: A future paradigm shift in the treatment of cancer                                                                                              | 10.1016/j.biopha.2021.112516      | Review              | 2022 | Not an original study                                                                                                         |
| The influence of tumor microenvironment on immune escape of melanoma                                                                                                                                       | 10.3390/ljms21218359              | Review              | 2020 | Not an original study                                                                                                         |
| The Interplay between MicroRNAs and the Components of the Tumor Microenvironment in B-Cell Malignancies                                                                                                    |                                   | Review              | 2020 | Not an original study                                                                                                         |
| The let-7 family of microRNAs suppresses immune evasion in head and neck squamous cell carcinoma by promoting PD-L1 degradation                                                                            | 10.1186/s12964-019-0490-8         | Article             | 2019 | Article included in qualitative synthesis                                                                                     |
| The miR-199a-5p/PD-L1 axis regulates cell proliferation, migration and invasion in follicular thyroid carcinoma                                                                                            | 10.1186/s12885-022-09838-0        | Article             | 2022 | Not experimentally demonstrating a direct association between the ICI effect on changes in the levels of miRNAs or vice versa |
| The miR-200 family of microRNAs: Fine tuners of epithelial-mesenchymal transition and circulating cancer biomarkers                                                                                        | 10.3390/cancers13235874           | Review              | 2021 | Not an original study                                                                                                         |
| The miR-25-93-106b cluster regulates tumor metastasis and immune evasion via modulation of CXCL12 and PD-L1                                                                                                | 10.18632/oncotarget.15450         | Article             | 2017 | Not experimentally demonstrating a direct association between the ICI effect on changes in the levels of miRNAs or vice versa |
| The mRNA expression profile of inflammatory tumors reveals a unique immune cell profile and potential companion targets for checkpoint blockade immunotherapy                                              |                                   | Abstract meeting    | 2019 | Not an original study                                                                                                         |
| The mRNA Profile of Inflammatory Colorectal Tumors Identify TGF-β as a Companion Target for Checkpoint Blockade Immunotherapy                                                                              | 10.3389/fcell.2021.754507         | Article             | 2021 | Not experimentally demonstrating a direct association between the ICI effect on changes in the levels of miRNAs or vice versa |
| The Molecular Basis and Therapeutic Aspects of Cisplatin Resistance in Oral Squamous Cell Carcinoma                                                                                                        | 10.3389/fonc.2021.761379          | Review              | 2021 | Not an original study                                                                                                         |
| The nivolumab/cabozantinib combination and the future of doublets in advanced renal cell cancer treatment                                                                                                  | 10.1177/10781552211027942         | Letter              | 2021 | Not an original study                                                                                                         |
| The origin of gastric cancer stem cells and their effects on gastric cancer: Novel therapeutic targets for gastric cancer                                                                                  | 10.3389/fonc.2022.960539          | Review              | 2022 | Not an original study                                                                                                         |
| The pleiotropic roles of circular and long noncoding RNAs in cutaneous melanoma                                                                                                                            | 10.1002/1878-0261.13034           | Review              | 2022 | Not an original study                                                                                                         |
| The positive and negative immunoregulatory role of b7 family: Promising novel targets in gastric cancer treatment                                                                                          | 10.3390/ljms221910719             | Review              | 2021 | Not an original study                                                                                                         |
| The Potential Regulatory Roles of Circular RNAs in Tumor Immunology and Immunotherapy                                                                                                                      |                                   | Review              | 2021 | Not an original study                                                                                                         |
| The Prognostic Significance and Potential Mechanism of Prolyl 3-Hydroxylase 1 in Hepatocellular Carcinoma                                                                                                  | 10.1155/2022/7854297              | Article             | 2022 | Not focused on ICIs                                                                                                           |
| The prognostic value and immunological role of angiogenesis-related patterns in colon adenocarcinoma                                                                                                       | 10.3389/fonc.2022.1003440         | Article             | 2022 | Not focused on miRNAs                                                                                                         |
| The progress of immune checkpoint therapy in primary liver cancer                                                                                                                                          | 10.1016/j.bbcan.2021.188638       | Review              | 2021 | Not an original study                                                                                                         |
| The Promise of Targeting Hypoxia to Improve Cancer Immunotherapy: Mirage or Reality?                                                                                                                       | 10.3389/fimmu.2022.880810         | Review              | 2022 | Not an original study                                                                                                         |
| The Regulatory Effects of MicroRNAs on Tumor Immunity                                                                                                                                                      | 10.1155/2022/2121993              | Review              | 2022 | Not an original study                                                                                                         |
| The regulatory role of long non- coding RNAs as a novel controller of immune response against cancer cells                                                                                                 | 10.1007/s11033-022-07947-4        | Review              | 2022 | Not an original study                                                                                                         |
| The role and therapeutic targeting of JAK/STAT signaling in glioblastoma                                                                                                                                   | 10.3390/cancers13030437           | Review              | 2021 | Not an original study                                                                                                         |
| The role of B7-H3 in tumors and its potential in clinical application                                                                                                                                      | 10.1016/j.intimp.2021.106153      | Review              | 2021 | Not an original study                                                                                                         |
| The Role of Circular RNAs in the Drug Resistance of Cancers                                                                                                                                                | 10.3389/fonc.2021.790589          | Review              | 2022 | Not an original study                                                                                                         |
| The role of ferroptosis in melanoma                                                                                                                                                                        | 10.1111/pcmr.13009                | Review              | 2022 | Not an original study                                                                                                         |
| The Role of Genomics and Proteomics in Lung Cancer Early Detection and Treatment                                                                                                                           | 10.3390/cancers14205144           | Review              | 2022 | Not an original study                                                                                                         |
| The role of host molecules in communication with the resident and pathogenic microbiota: A review                                                                                                          | 10.1016/j.medmic.2020.100005      | Review              | 2020 | Not an original study                                                                                                         |
| The Role of ncRNAs to Regulate Immune Checkpoints in Cancer                                                                                                                                                | 10.3389/fimmu.2022.853480         | Review              | 2022 | Not an original study                                                                                                         |
| The role of tumor associated macrophages (Tams) in cancer pro-gression, chemoresistance, angiogenesis and metastasis-current status                                                                        | 10.2174/0929867328666210720143721 | Review              | 2021 | Not an original study                                                                                                         |
| The Roles of MiRNAs (MicroRNAs) in Melanoma Immunotherapy                                                                                                                                                  | 10.3390/ljms223214775             | Review              | 2022 | Not an original study                                                                                                         |
| The Significance of Tumor Microenvironment Score for Breast Cancer Patients                                                                                                                                | 10.1155/2022/5673810              | Article             | 2022 | Not experimentally demonstrating a direct association between the ICI effect on changes in the levels of miRNAs or vice versa |
| Therapeutics Targeting FGF Signaling Network in Human Diseases                                                                                                                                             | 10.1016/j.tips.2016.10.003        | Review              | 2016 | Not an original study                                                                                                         |
| Think global but act local: Tuning the dendritic cell response in cancer                                                                                                                                   | 10.1016/j.biocel.2022.106227      | Short Survey        | 2022 | Not an original study                                                                                                         |
| Thirty years of Epstein-Barr virus-associated gastric carcinoma                                                                                                                                            | 10.1007/s00429-019-02724-4        | Review              | 2020 | Not an original study                                                                                                         |
| Tim-3 promotes tumor-promoting M2 macrophage polarization by binding to STAT1 and suppressing the STAT1-miR-155 signaling axis                                                                             | 10.1080/2162402X.2016.1211219     | Article             | 2016 | Not experimentally demonstrating a direct association between the ICI effect on changes in the levels of miRNAs or vice versa |
| Tissue- and liquid-based biomarkers in prostate cancer precision medicine                                                                                                                                  | 10.3390/jpm111070664              | Review              | 2021 | Not an original study                                                                                                         |
| Transcriptional regulation of cancer immune checkpoints: Emerging strategies for immunotherapy                                                                                                             | 10.3390/vaccines8040735           | Review              | 2020 | Not an original study                                                                                                         |
| Translational Implications of Dysregulated Pathways and microRNA Regulation in Quadruple-Negative Breast Cancer                                                                                            | 10.3390/biomedicines10020366      | Review              | 2022 | Not an original study                                                                                                         |
| Translational Modeling Identifies Synergy between Nanoparticle-Delivered miRNA-22 and Standard-of-Care Drugs in Triple-Negative Breast Cancer                                                              | 10.1007/s11095-022-03176-3        | Article             | 2022 | Not experimentally demonstrating a direct association between the ICI effect on changes in the levels of miRNAs or vice versa |
| Tumor Microenvironment Analysis Identified Subtypes Associated With the Prognosis and the Tumor Response to Immunotherapy in Bladder Cancer                                                                | 10.3389/fgene.2021.551605         | Article             | 2021 | Not experimentally demonstrating a direct association between the ICI effect on changes in the levels of miRNAs or vice versa |
| Tumor Secretome to Adoptive Cellular Immunotherapy: Reduce Me Before I Make You My Partner                                                                                                                 | 10.3389/fimmu.2021.717850         | Review              | 2021 | Not an original study                                                                                                         |
| Tumor-derived microRNAs induce myeloid suppressor cells and predict immunotherapy resistance in melanoma                                                                                                   | 10.1177/10781552211027942         | Article             | 2021 | Not experimentally demonstrating a direct association between the ICI effect on changes in the levels of miRNAs or vice versa |
| Tumor-Intrinsic PD-L1 Exerts an Oncogenic Function through the Activation of the Wnt/β-Catenin Pathway in Human Non-Small Cell Lung Cancer                                                                 | 10.3390/ljms221911031             | Article             | 2022 | Not experimentally demonstrating a direct association between the ICI effect on changes in the levels of miRNAs or vice versa |
| Tumor-intrinsic SIRPA promotes sensitivity to checkpoint inhibition immunotherapy in melanoma                                                                                                              | 10.1016/j.ccell.2022.10.012       | Review              | 2022 | Not an original study                                                                                                         |
| Tumor-Secreted Extracellular Vesicles Regulate T-Cell Costimulation and Can Be Manipulated To Induce Tumor-Specific T-Cell Responses                                                                       | 10.1053/j.gastro.2021.04.036      | Article             | 2021 | Article included in qualitative synthesis                                                                                     |
| Tumor-Specific and Tumor-Agnostic Molecular Signatures Associated With Response to Immune Checkpoint Inhibitors                                                                                            | 10.1200/P0.21.00008               | Article             | 2021 | Not focused on miRNAs                                                                                                         |
| Tumour evolution and seed and soil mechanism in pancreatic metastases of renal cell carcinoma                                                                                                              | 10.3390/cancers13061342           | Review              | 2021 | Not an original study                                                                                                         |
| Twentieth Anniversary of Molecular Cancer Therapeutics: A Vision for the Future                                                                                                                            | 10.1158/1535-7163.MCT-21-0771     | Editorial Material  | 2021 | Not an original study                                                                                                         |
| Ulcerated Cutaneous Melanoma: A Review of the Clinical, Histologic, and Molecular Features Associated with a Clinically Aggressive Histologic Phenotype                                                    | 10.2147/CCID.S372287              | Review              | 2022 | Not an original study                                                                                                         |
| Uncovering the Subtype-Specific Molecular Characteristics of Breast Cancer by Multioics Analysis of Prognosis-Associated Genes, Driver Genes, Signaling Pathways, and Immune Activity                      | 10.3389/fcell.2021.689028         | Article             | 2021 | Not focused neither on mRNA nor on ICIs                                                                                       |
| Unique features of hepatitis b virus-related hepatocellular carcinoma in pathogenesis and clinical significance                                                                                            | 10.3390/cancers13102454           | Review              | 2021 | Not an original study                                                                                                         |
| Unveiling Novel Therapeutic Drug Targets and Prognostic Markers of Triple Negative Breast Cancer                                                                                                           | 10.2174/1568009621666210908113010 | Review              | 2021 | Not an original study                                                                                                         |
| Upregulating hsa-miR-128a Increased the Effects of Pembrolizumab on Laryngeal Cancer Cells via the p53 Pathway                                                                                             | 10.1155/2021/2342784              | Article             | 2021 | Article included in qualitative synthesis                                                                                     |
| Utomilumab in Patients With Immune Checkpoint Inhibitor-Refractory Melanoma and Non-Small-Cell Lung Cancer                                                                                                 | 10.3389/fimmu.2022.897991         | Article             | 2022 | Not focused on miRNAs                                                                                                         |
| Virally programmed extracellular vesicles sensitize cancer cells to oncolytic virus and small molecule therapy                                                                                             | 10.1038/s41467-022-29526-8        | Article             | 2022 | Not experimentally demonstrating a direct association between the ICI effect on changes in the levels of miRNAs or vice versa |
| What Do We Have to Know about PD-L1 Expression in Prostate Cancer? A Systematic Literature Review. Part 5: Epigenetic Regulation of PD-L1                                                                  | 10.3390/ljms222212314             | Review              | 2021 | Not an original study                                                                                                         |
| What Is Known about Theragnostic Strategies in Colorectal Cancer                                                                                                                                           | 10.3390/biomedicines9020140       | Review              | 2021 |                                                                                                                               |

|                                                                                                                    |                               |         |      |                                                                                                                               |
|--------------------------------------------------------------------------------------------------------------------|-------------------------------|---------|------|-------------------------------------------------------------------------------------------------------------------------------|
| Win or lose? Combination therapy does improve the oncolytic virus therapy to pancreatic cancer                     | 10.1186/s12935-022-02583-1    | Review  | 2022 | Not an original study                                                                                                         |
| World Cancer Day 2021 - Perspectives in Pediatric and Adult Neuro-Oncology                                         | 10.3389/fonc.2021.655800      | Review  | 2021 | Not an original study                                                                                                         |
| XIST/miR-34a-5p/PDL1 axis regulated the development of lung cancer cells and the immune function of CD8(+) T cells | 10.1080/10799893.2021.2018274 | Article | 2022 | Not experimentally demonstrating a direct association between the ICI effect on changes in the levels of miRNAs or vice versa |
| ZCCHC17 Served as a Predictive Biomarker for Prognosis and Immunotherapy in Hepatocellular Carcinoma               | 10.3389/fonc.2021.799566      | Article | 2021 | Not focused on miRNAs                                                                                                         |
